# Supplementary material
Source: MDPI journal article supplement (https://www.mdpi.com/1996-1073/11/4/1004)
Supplement: s1 [file s1]

**FUGRO**

## **Wave Statistics off Kenyan Coast**

Fugro Document No.: 162030-1-R0

06 February 2017

Uppsala Universitet

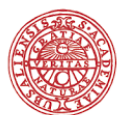

UPPSALA  
UNIVERSITET

Initial Issue

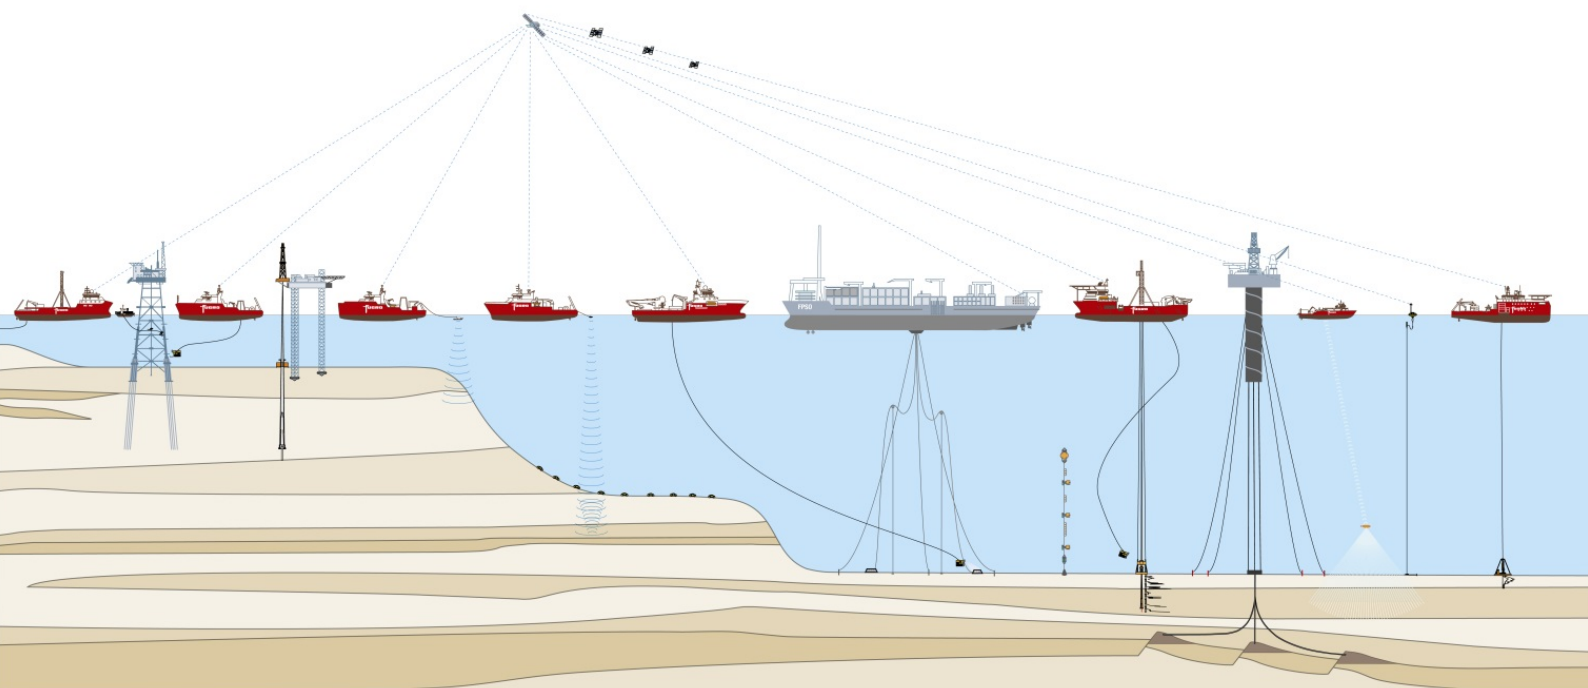

**FUGRO**

**Wave Statistics off Kenyan Coast**

Fugro Document No.: 162030-1-R0

Prepared for: Uppsala Universitet

On behalf of: Jens Engström

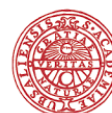

UPPSALA  
UNIVERSITET

|              |                        |                 |                 |                 |                  |
|--------------|------------------------|-----------------|-----------------|-----------------|------------------|
| R0           | Initial Issue          | Sophie Noon     | Richard Sproson | Richard Sproson | 06 February 2017 |
| <b>Issue</b> | <b>Document Status</b> | <b>Prepared</b> | <b>Checked</b>  | <b>Approved</b> | <b>Date</b>      |

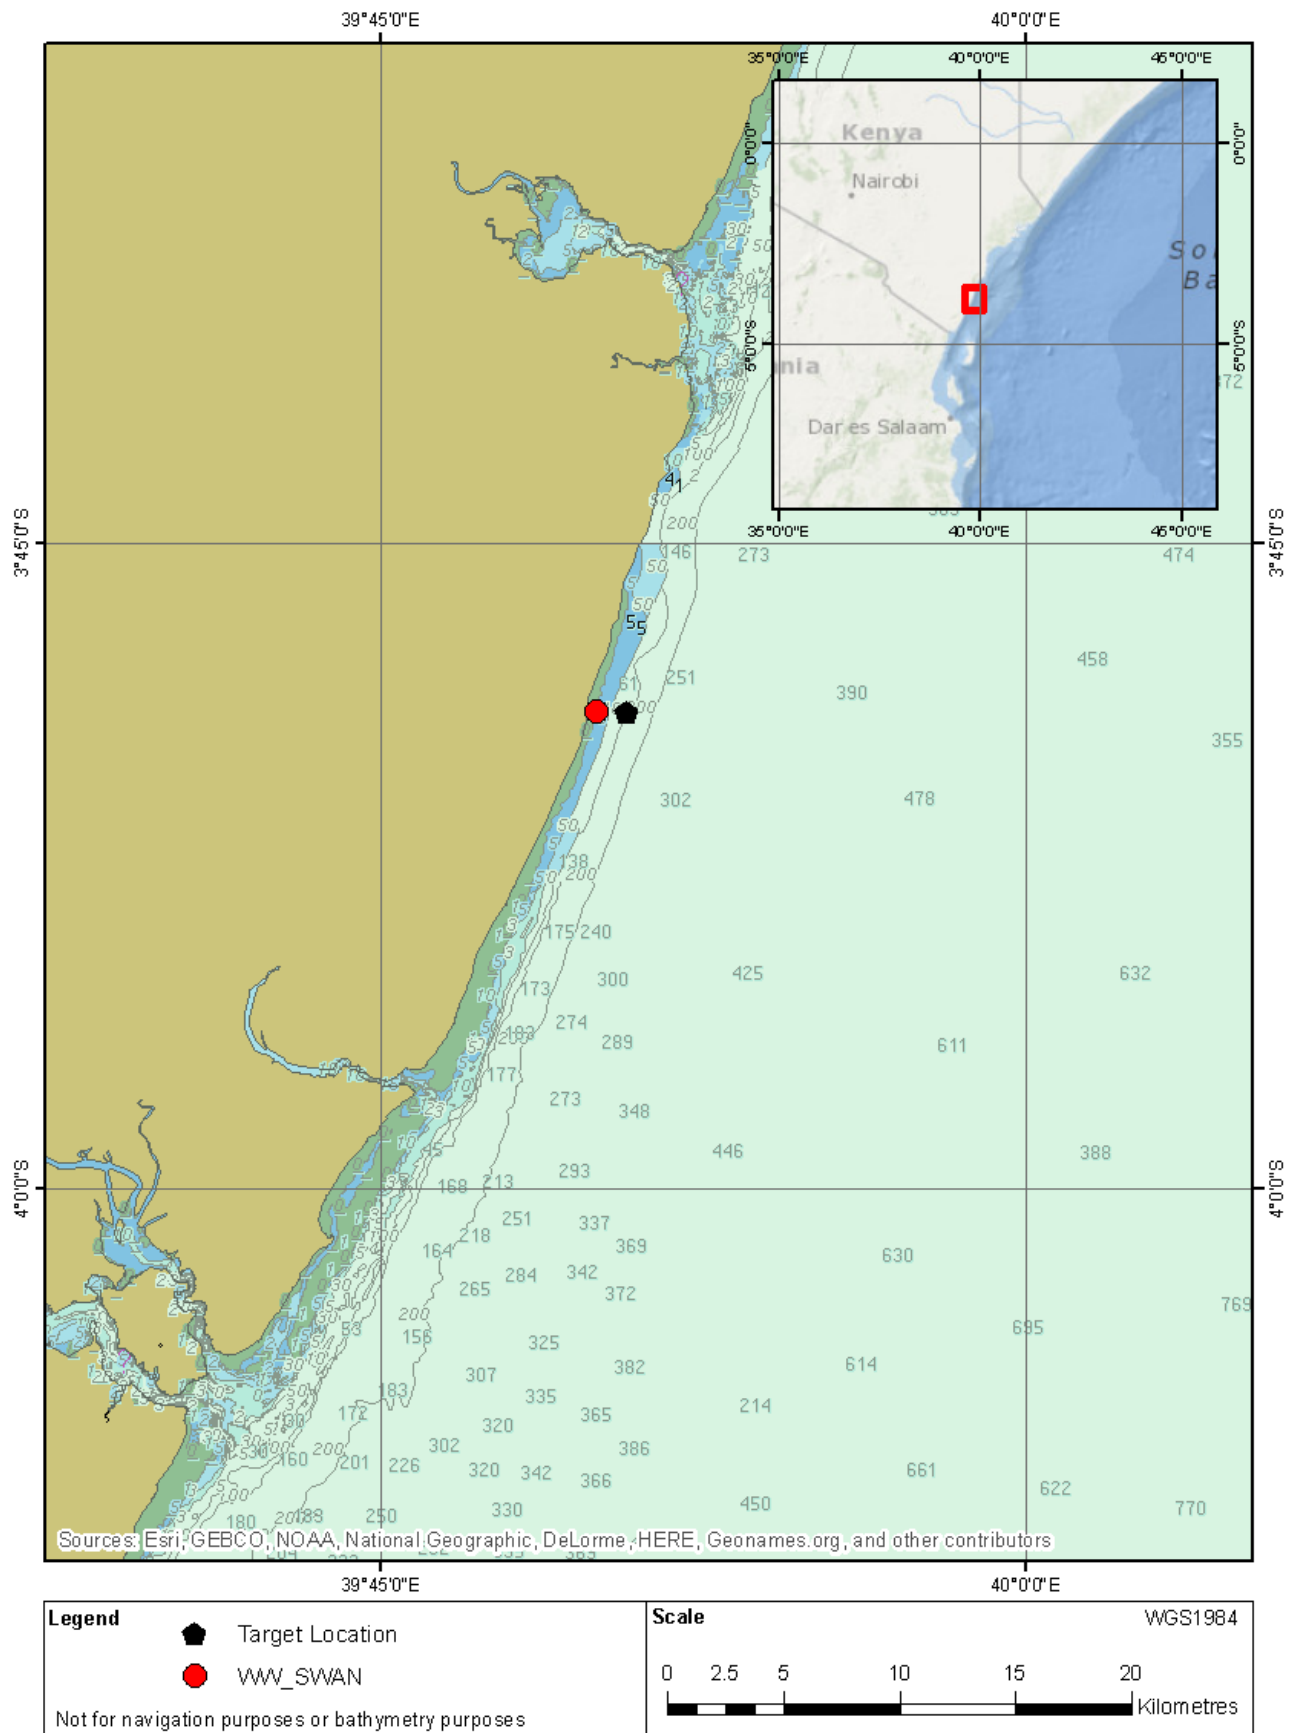

## FRONTISPICE

## **EXECUTIVE SUMMARY**

This report has been prepared on behalf of the wave energy research group at Uppsala Universitet and provides wave criteria offshore Kenya in the Indian Ocean. The target location was 3.815° S, 39.846° E, in a water depth of approximately 34 m.

The report is based on the analysis of the WorldWaves data for the period January 1997 to December 2015. Due to the steep bathymetry near the coast offshore Kenya, the target location in WorldWaves was deeper than anticipated, therefore, wave criteria were instead derived from a nearby location of 3.815° S, 39.834° E, in a water depth of 35 m. The location of the data source is shown in the Frontispiece.

At this location, wave directions from the model data propagated predominantly from an east and south-eastward direction throughout the year. Significant wave heights typically ranged between 0.75 m and 2.00 m; with a maximum significant wave height of 3.37 m. Mean wave energy periods were between 3.28 s and 15.97 s with the most commonly occurring wave energy periods between 6 s and 8 s. The maximum peak wave period was 18.51 s; the most common occurrence was between 8 s and 9 s with a significant wave height between 1.00 m and 1.25 m.

## CONTENTS

|           |                                         |          |
|-----------|-----------------------------------------|----------|
| <b>1.</b> | <b>INTRODUCTION</b>                     | <b>1</b> |
| 1.1       | Background                              | 1        |
| 1.2       | Units and Conventions                   | 1        |
| 1.3       | Parameter Descriptions                  | 1        |
| <b>2.</b> | <b>DATA SOURCES</b>                     | <b>2</b> |
| 2.1       | WorldWaves                              | 2        |
| <b>3.</b> | <b>OPERATIONAL ANALYSIS</b>             | <b>3</b> |
| 3.1       | Operational Wave Criteria – Hs and Mdir | 4        |
| 3.2       | Operational Wave Criteria – Hs and Te   | 18       |
| 3.3       | Operational Wave Criteria – Hs and Tp   | 26       |

## ABBREVIATIONS

|      |                            |
|------|----------------------------|
| SWAN | Simulating Waves Nearshore |
| UTC  | Universal Coordinated Time |
| WGS  | World Geodetic System      |
| WW   | WorldWaves                 |

## 1. INTRODUCTION

### 1.1 Background

This report has been prepared on behalf of the wave energy research group at Uppsala Universitet and provides wave criteria offshore Kenya in the Indian Ocean. The target location was 3.815° S, 39.846° E, in a water depth of approximately 34 m.

The report is based on the analysis of the WorldWaves data for the period January 1997 to December 2015. Due to the steep bathymetry near the coast offshore Kenya, the target location in WorldWaves was deeper than anticipated, therefore, wave criteria were instead derived from a nearby location of 3.815° S, 39.834° E, in a water depth of 35 m. The location of the data source is shown in the Frontispiece.

### 1.2 Units and Conventions

The following list describes the units and conventions used in this report. Where possible, units have been expressed using SI convention.

- Wave height is expressed in metres [m];
- Wave period is expressed in seconds [s];
- Wave direction is expressed in compass points or degrees, measured clockwise from true north, and describes the direction from which the waves were travelling;
- Positions are quoted relative to WGS84 except where stated;
- All times are quoted in Coordinated Universal Time [UTC].

### 1.3 Parameter Descriptions

The following table provides summary descriptions of the primary metocean parameters.

**Table 1.3.1: Parameter Descriptions**

| Parameter | Units | Description             | Comments                                                                                                                                                                       |
|-----------|-------|-------------------------|--------------------------------------------------------------------------------------------------------------------------------------------------------------------------------|
| Mdir      | deg   | Mean wave direction     |                                                                                                                                                                                |
| Hs        | m     | Significant wave height | Estimated from the wave energy spectrum, $H_s = 4\sqrt{m_0}$ . Equivalent to the mean height (from wave crest to trough) of the highest one-third of the waves in a sea-state. |
| Tp        | s     | Peak period             | The period associated with the peak in the wave energy spectrum.                                                                                                               |
| Te        | s     | Mean wave energy period | $T_e = m_{-1}/m_0$                                                                                                                                                             |

## 2. DATA SOURCES

### 2.1 WorldWaves

The WorldWaves data used to provide wave statistics originate from the European Centre for Medium-range Weather Forecasts (ECWMF) Wave Model archive and are calibrated and corrected by Fugro Oceanor against a global buoy and multi-satellite altimeter database (Topex, Jason, Geosat, GFO and Envisat). Offshore wave data from four grid points (red dots in Figure 2.1.1) were transformed to location 3.815° S, 39.834° E (yellow circle see Figure 2.1.1), using the SWAN (Simulating Wave Nearshore) model. Data from the selected grid point is available on 6-hourly intervals from 1 January 1997 to 31 December 2015.

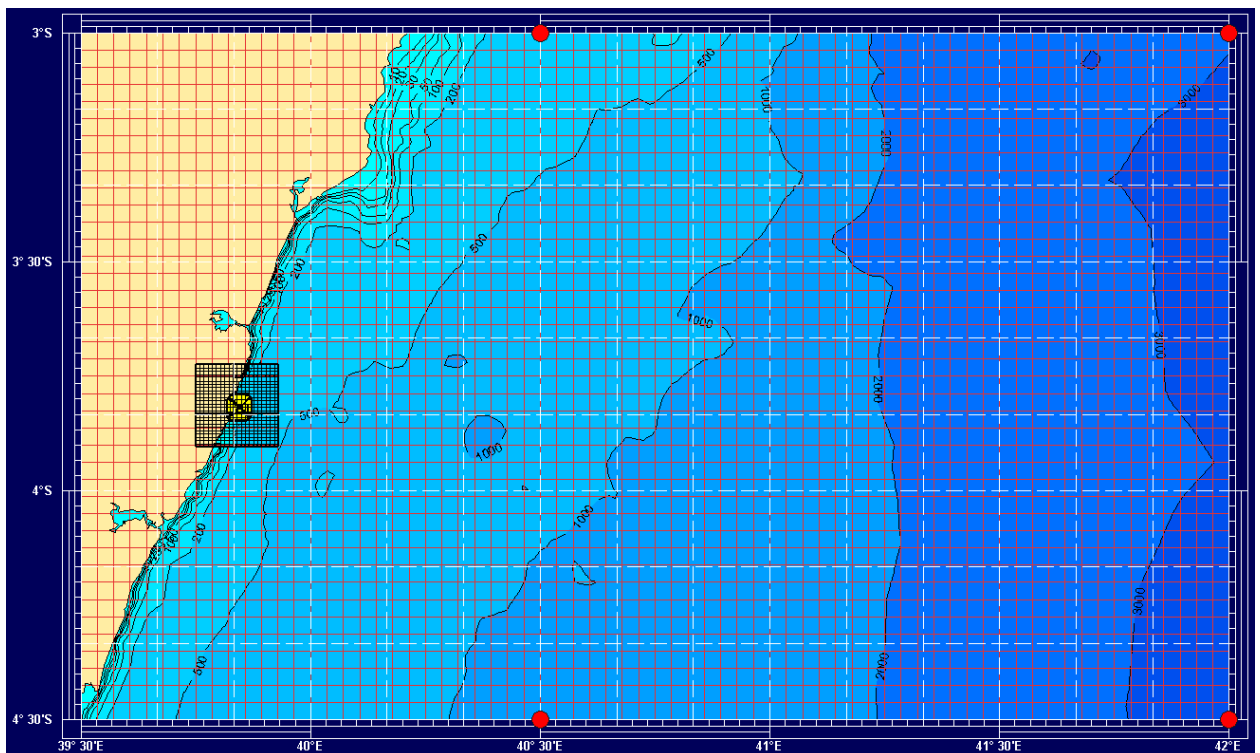

Figure 2.1.1: Offshore WorldWaves Grid Points (red dots) and Target Location (yellow circle)



### 3. OPERATIONAL ANALYSIS

Operational wave criteria have been derived from analysis of the SWAN output for the location 3.815° S, 39.834° E. The following operational criteria are presented:

- Monthly and all-year joint frequency distributions and rose plots of Hs and Mdir;
- Monthly and all-year joint frequency distributions of Hs and Te;
- Monthly and all-year joint frequency distributions of Hs and Tp.

### 3.1 Operational Wave Criteria – Hs and Mdir

The following figures are presented in this section:

Figure 3.1.1: Percentage Occurrence of Hs and Mdir – All-Year

Figure 3.1.2: Percentage Occurrence of Hs and Mdir – January

Figure 3.1.3: Percentage Occurrence of Hs and Mdir – February

Figure 3.1.4: Percentage Occurrence of Hs and Mdir – March

Figure 3.1.5: Percentage Occurrence of Hs and Mdir – April

Figure 3.1.6: Percentage Occurrence of Hs and Mdir – May

Figure 3.1.7: Percentage Occurrence of Hs and Mdir – June

Figure 3.1.8: Percentage Occurrence of Hs and Mdir – July

Figure 3.1.9: Percentage Occurrence of Hs and Mdir – August

Figure 3.1.10: Percentage Occurrence of Hs and Mdir – September

Figure 3.1.11: Percentage Occurrence of Hs and Mdir – October

Figure 3.1.12: Percentage Occurrence of Hs and Mdir – November

Figure 3.1.13: Percentage Occurrence of Hs and Mdir – December

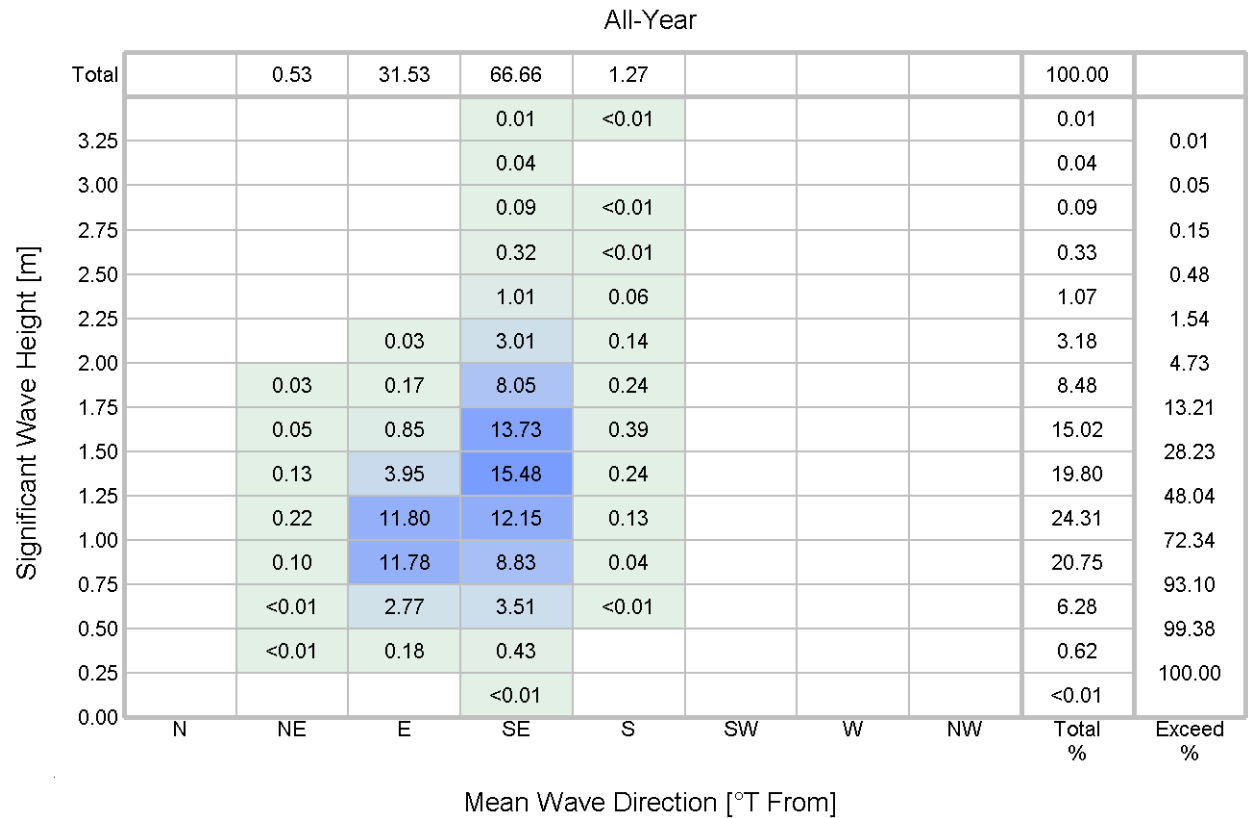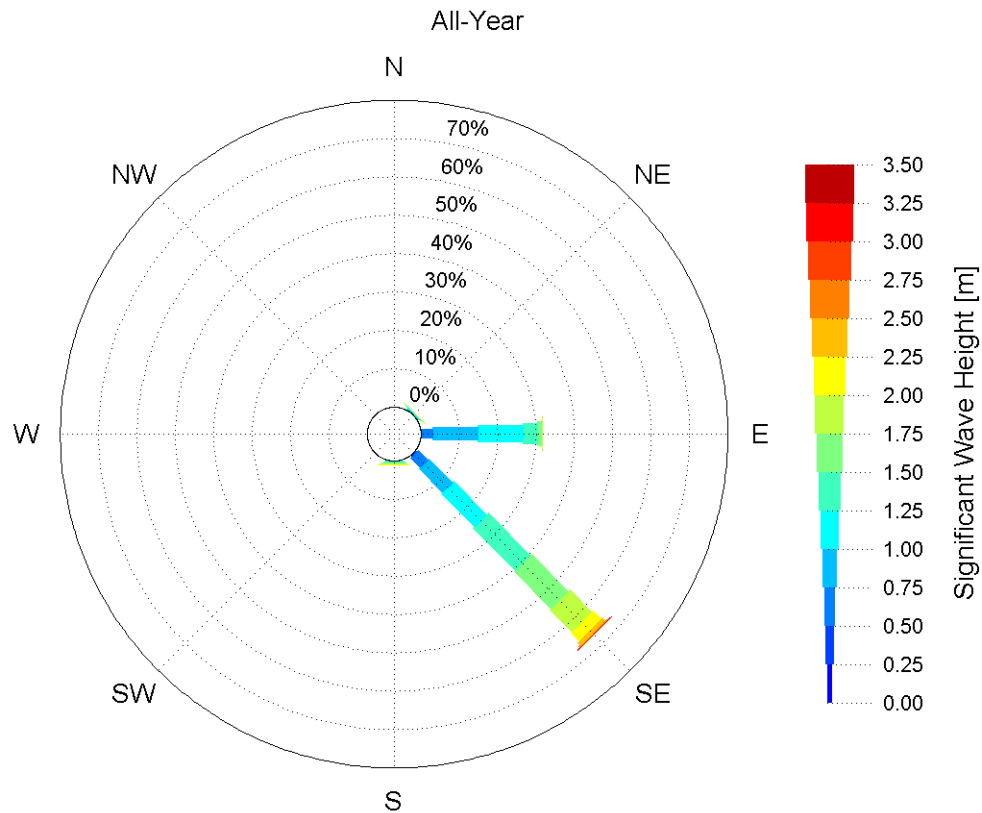

Figure 3.1.1: Percentage Occurrence of Hs and Mdir – All-Year

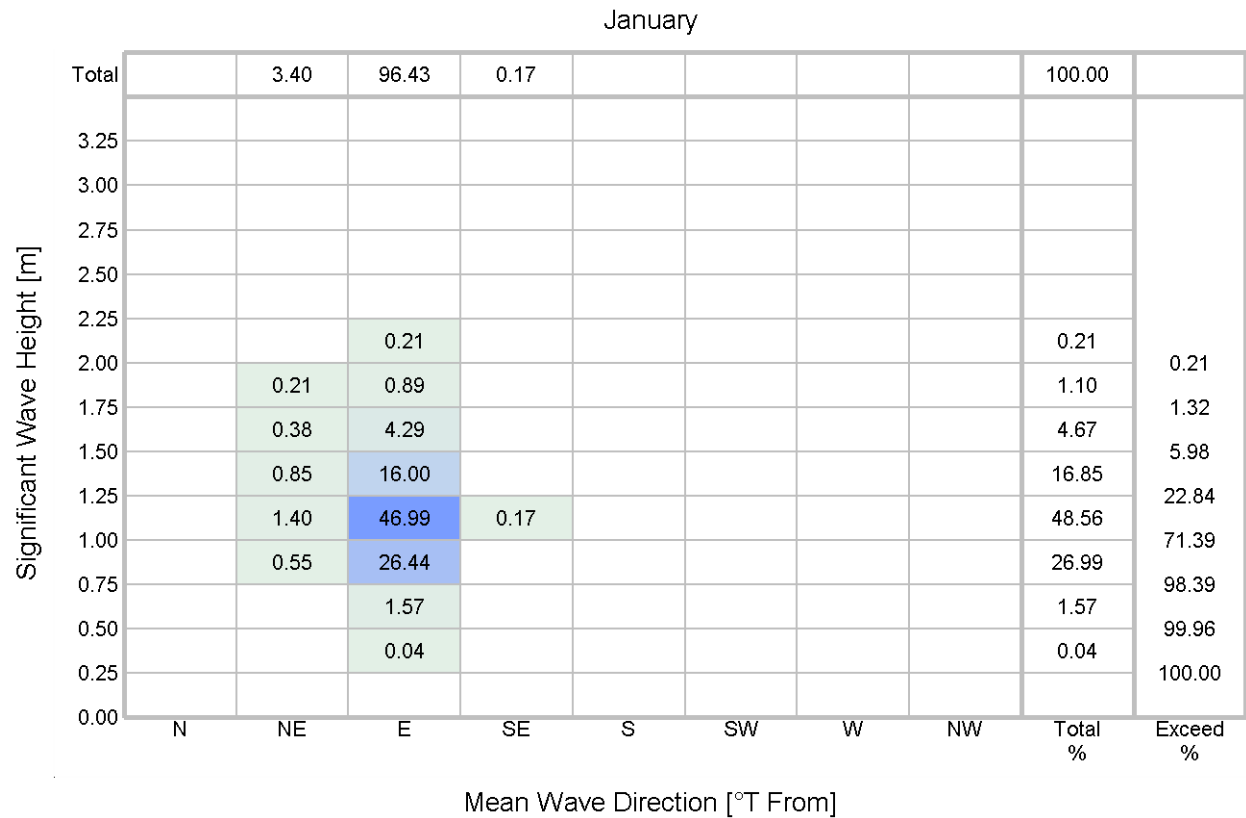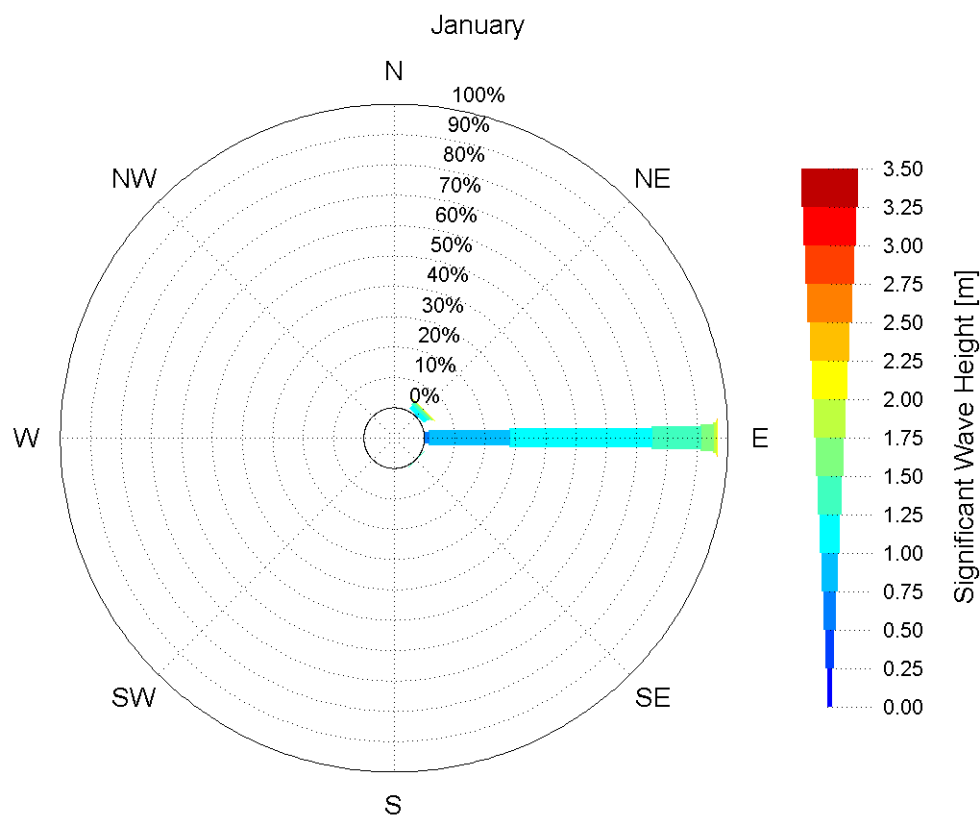

Figure 3.1.2: Percentage Occurrence of Hs and Mdir – January

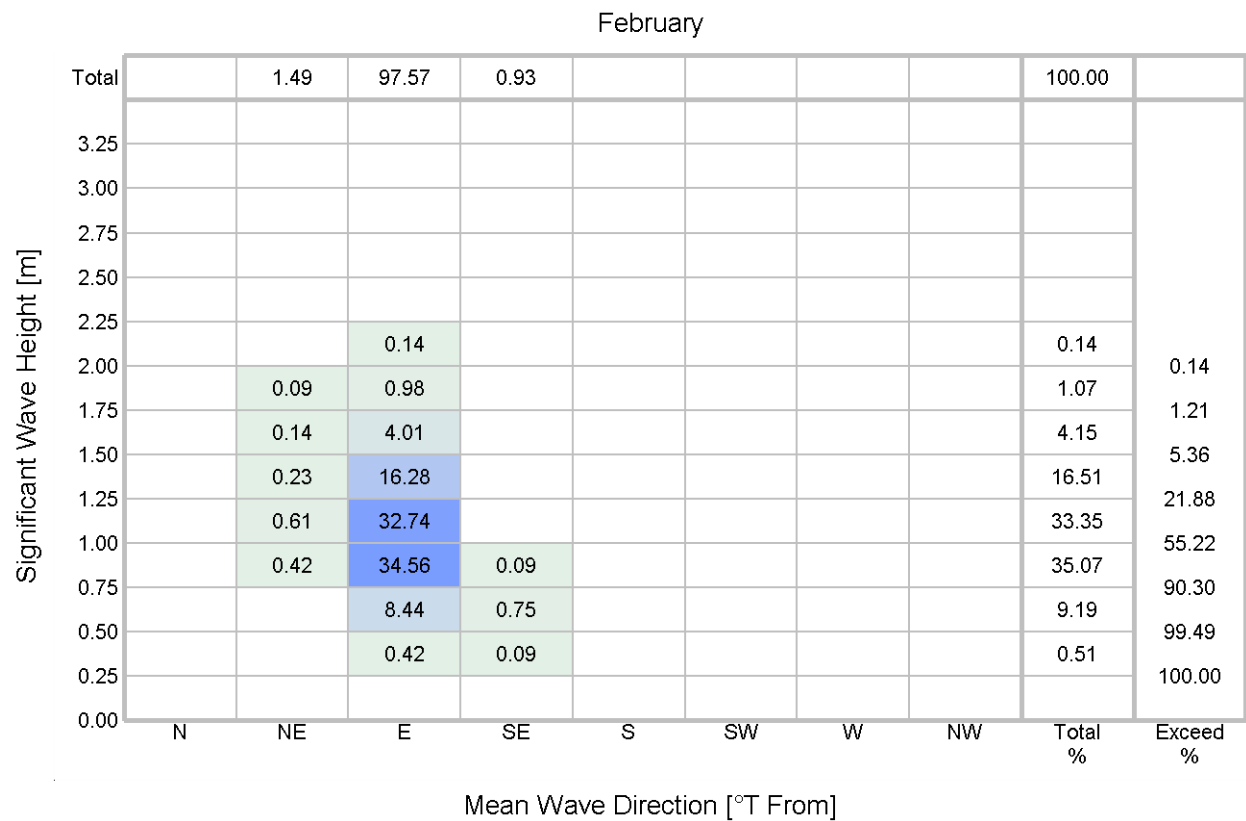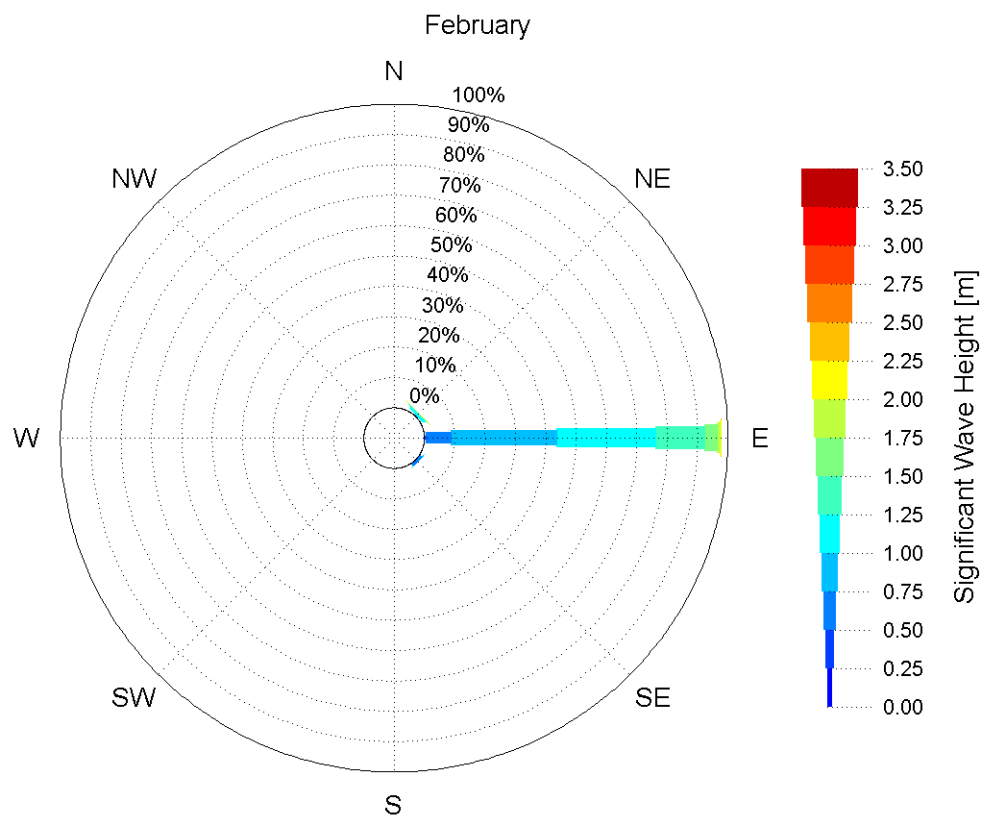

Figure 3.1.3: Percentage Occurrence of Hs and Mdir – February

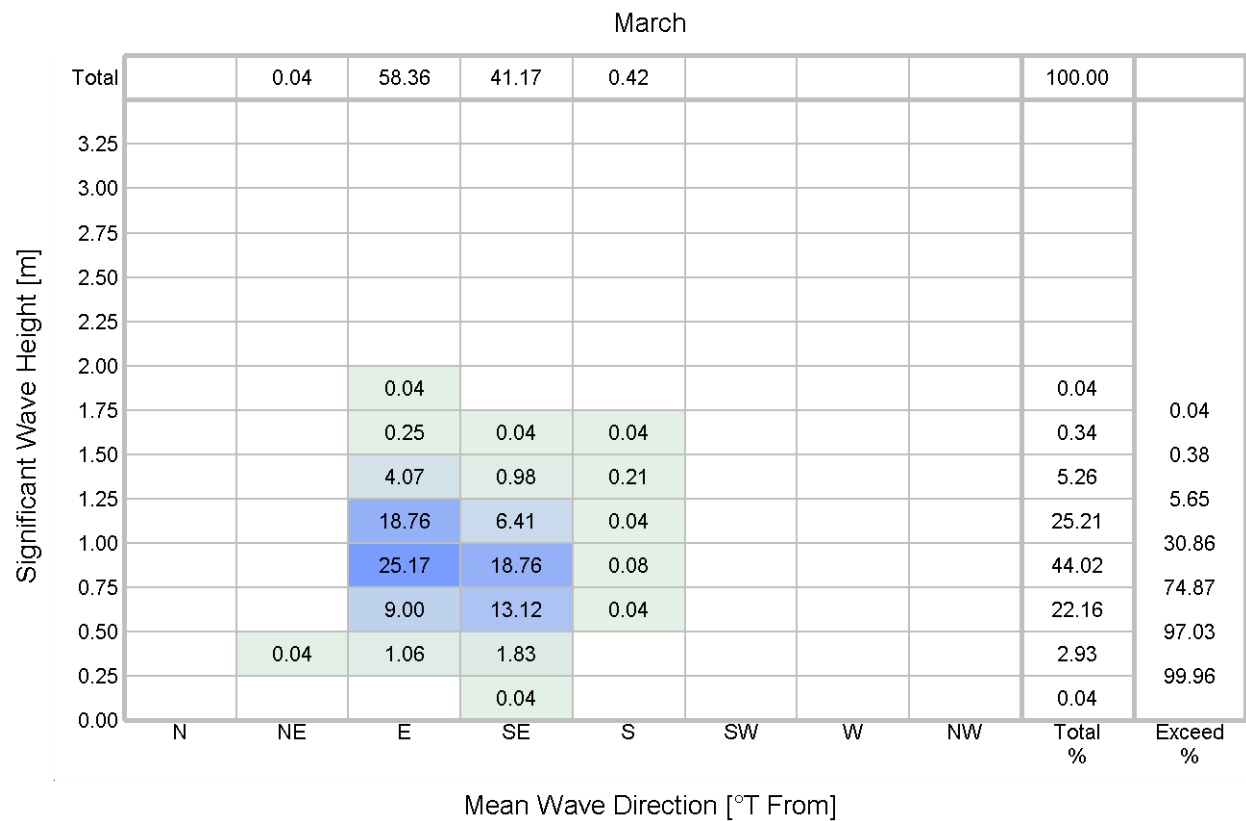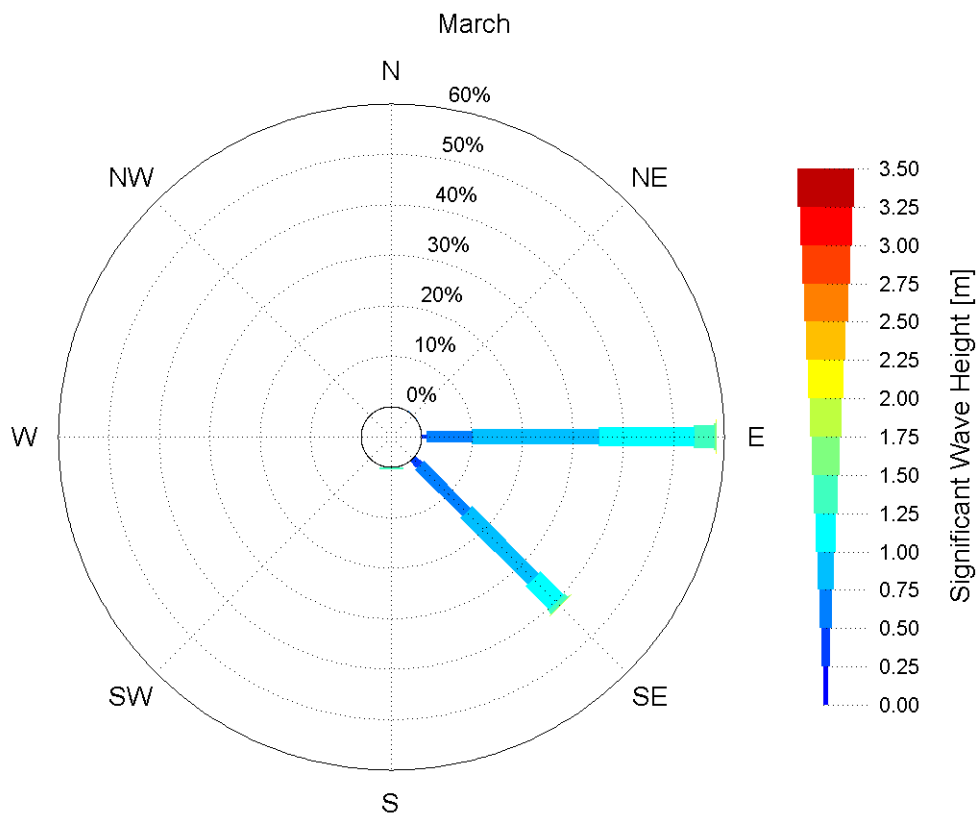

Figure 3.1.4: Percentage Occurrence of Hs and Mdir – March

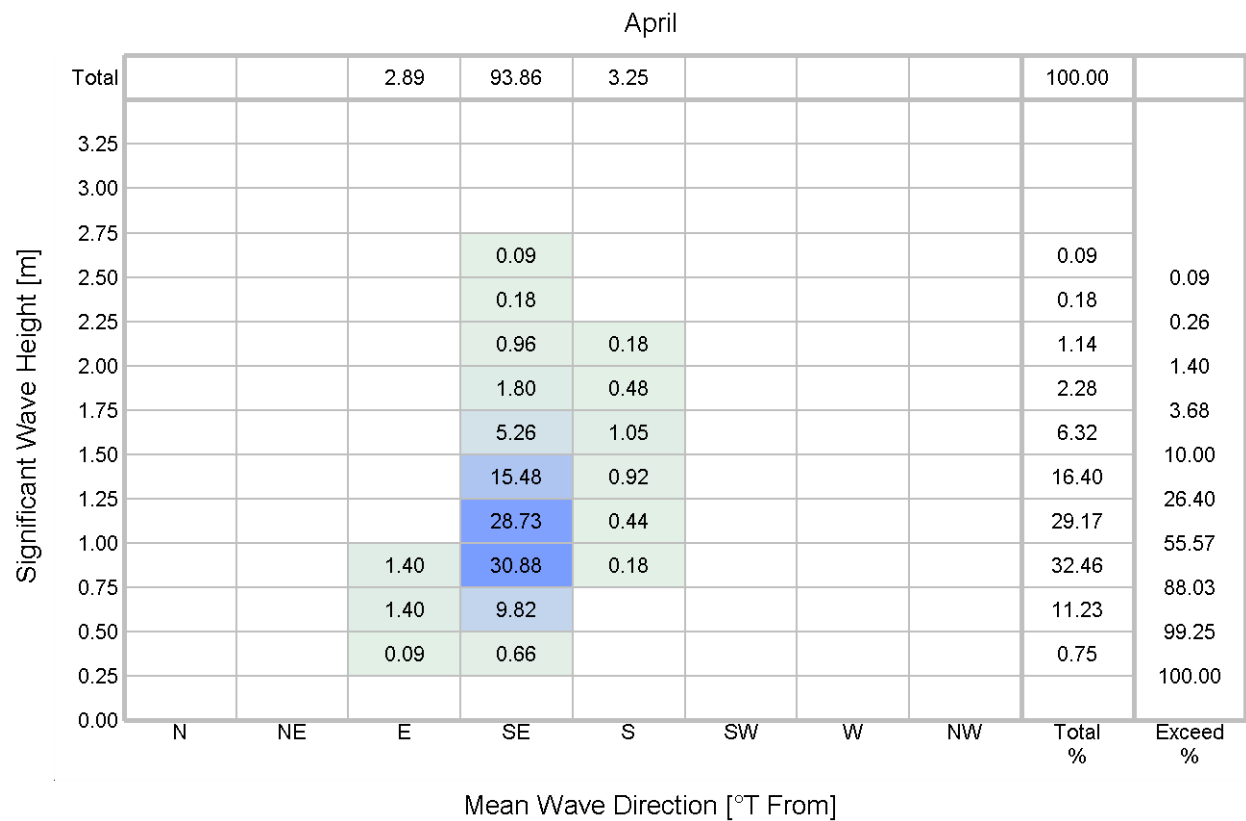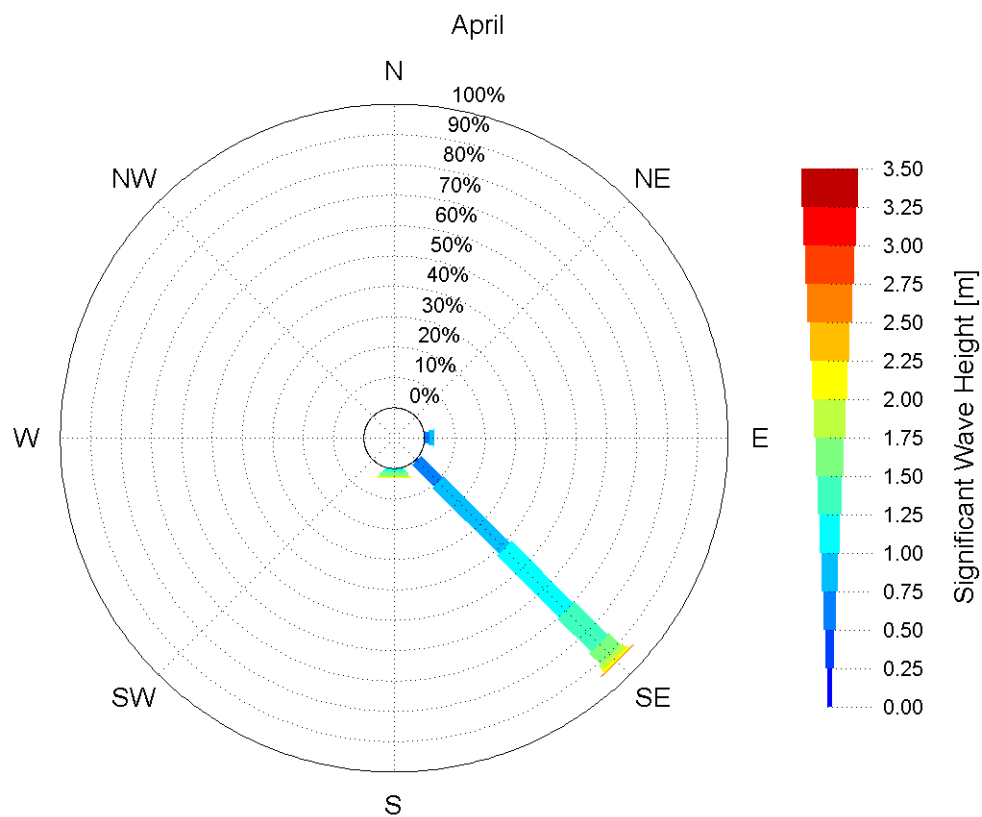

Figure 3.1.5: Percentage Occurrence of Hs and Mdir – April

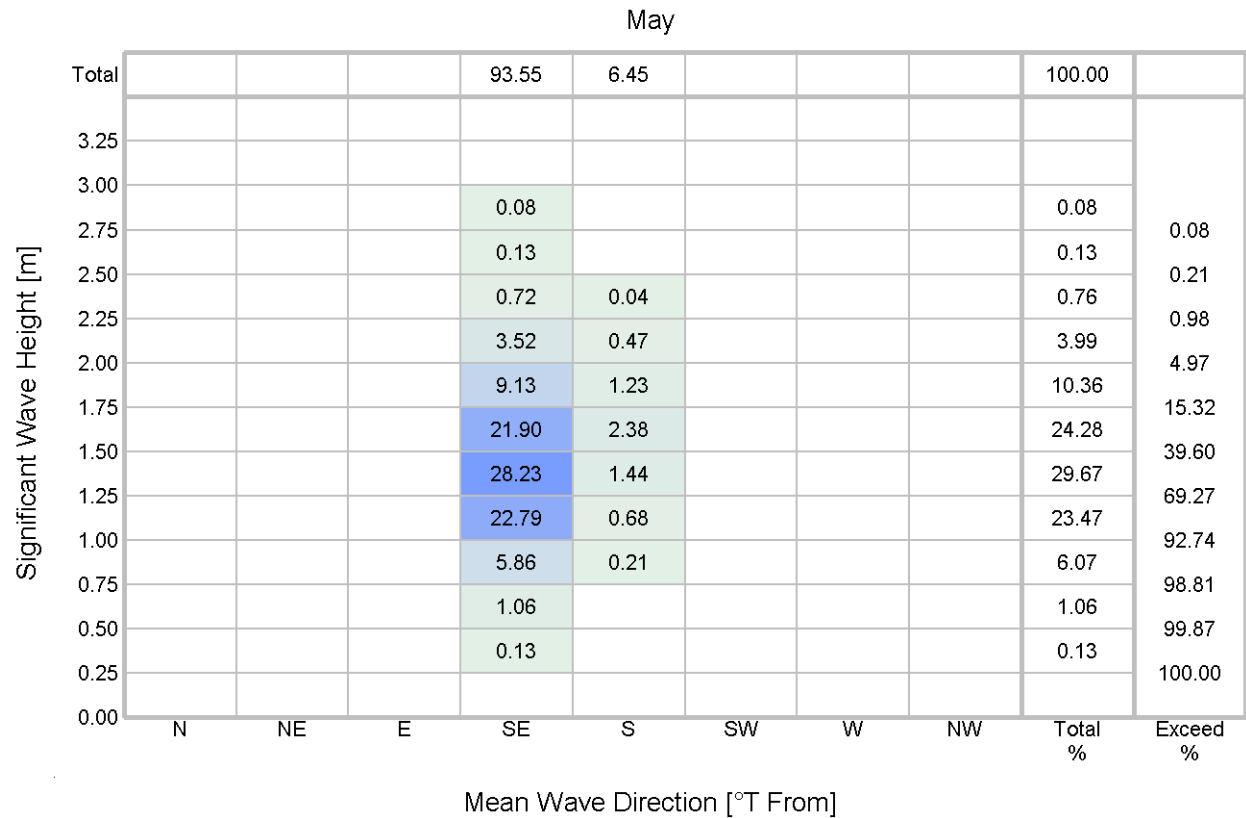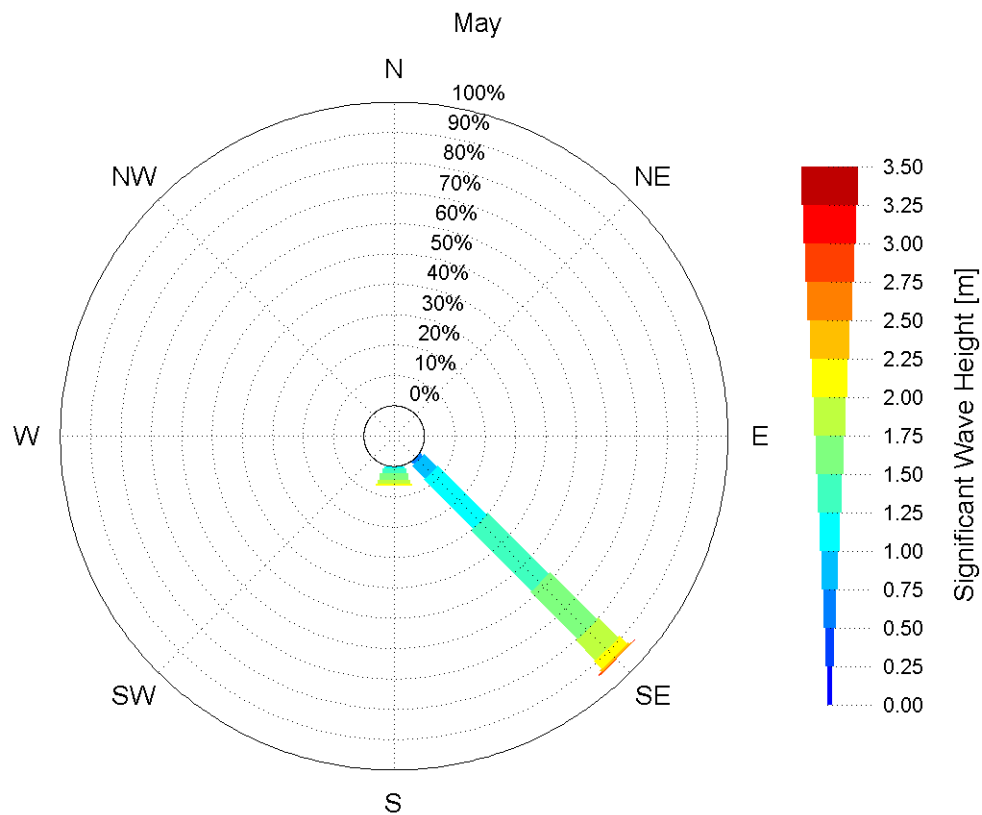

Figure 3.1.6: Percentage Occurrence of Hs and Mdir – May



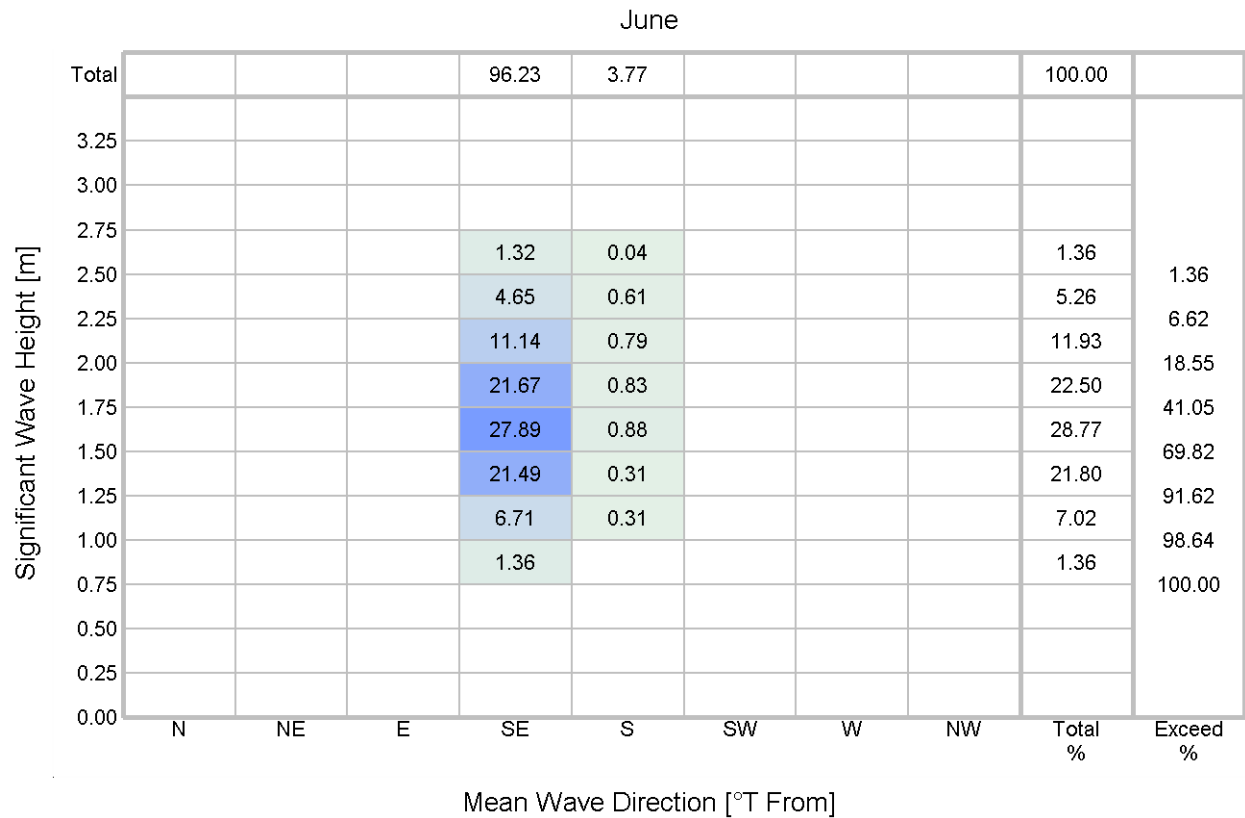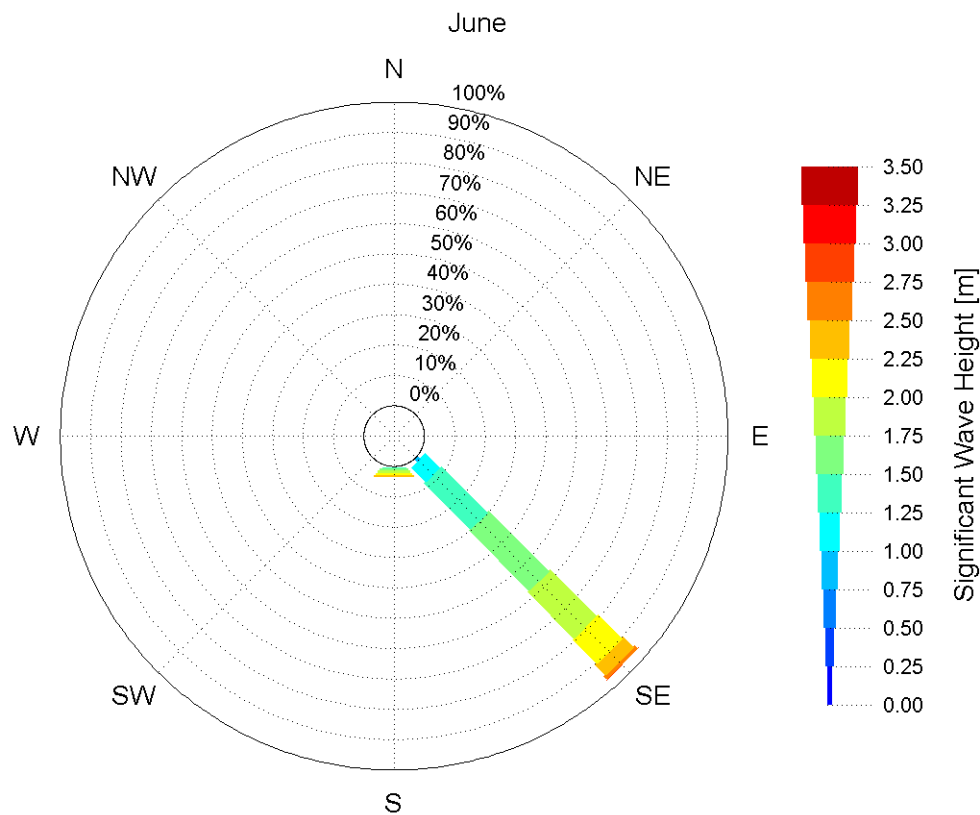

Figure 3.1.7: Percentage Occurrence of Hs and Mdir – June

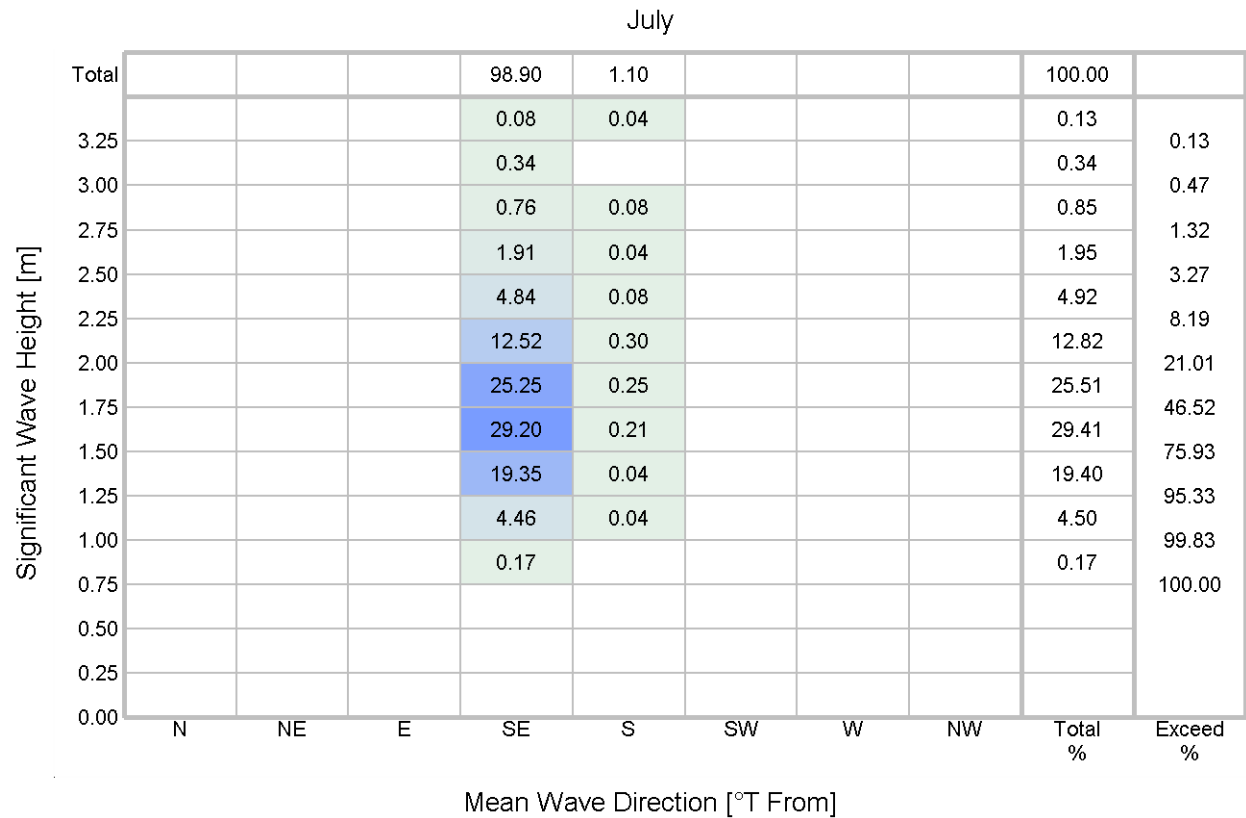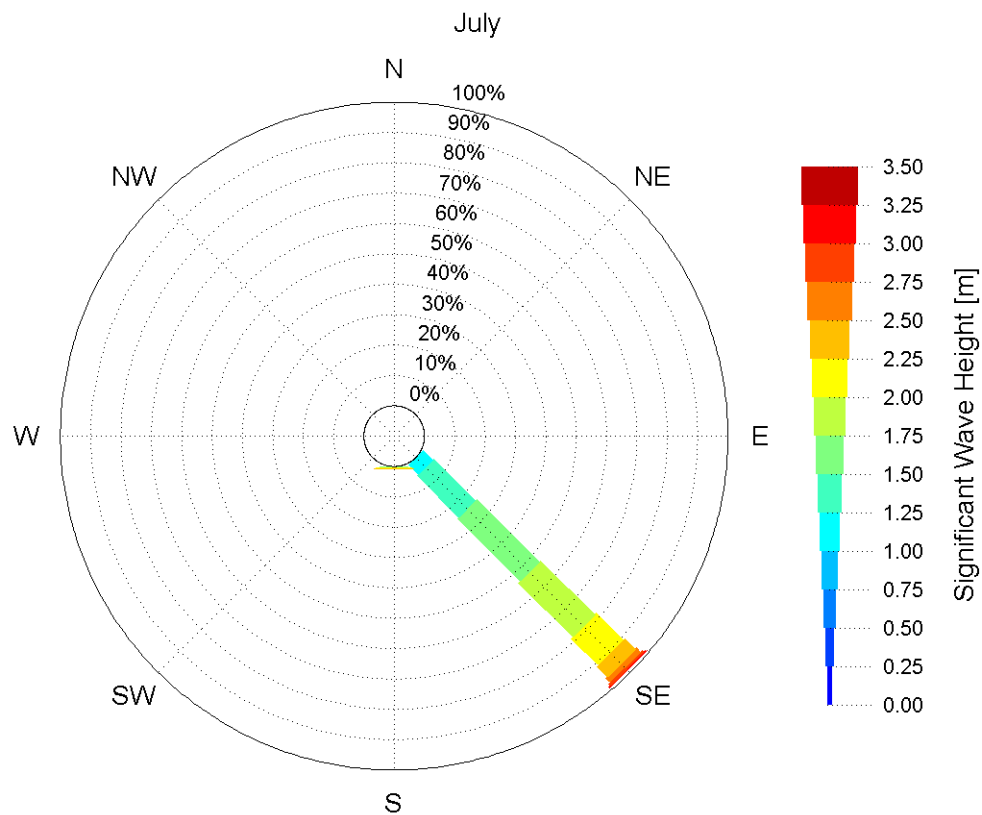

Figure 3.1.8: Percentage Occurrence of Hs and Mdir – July

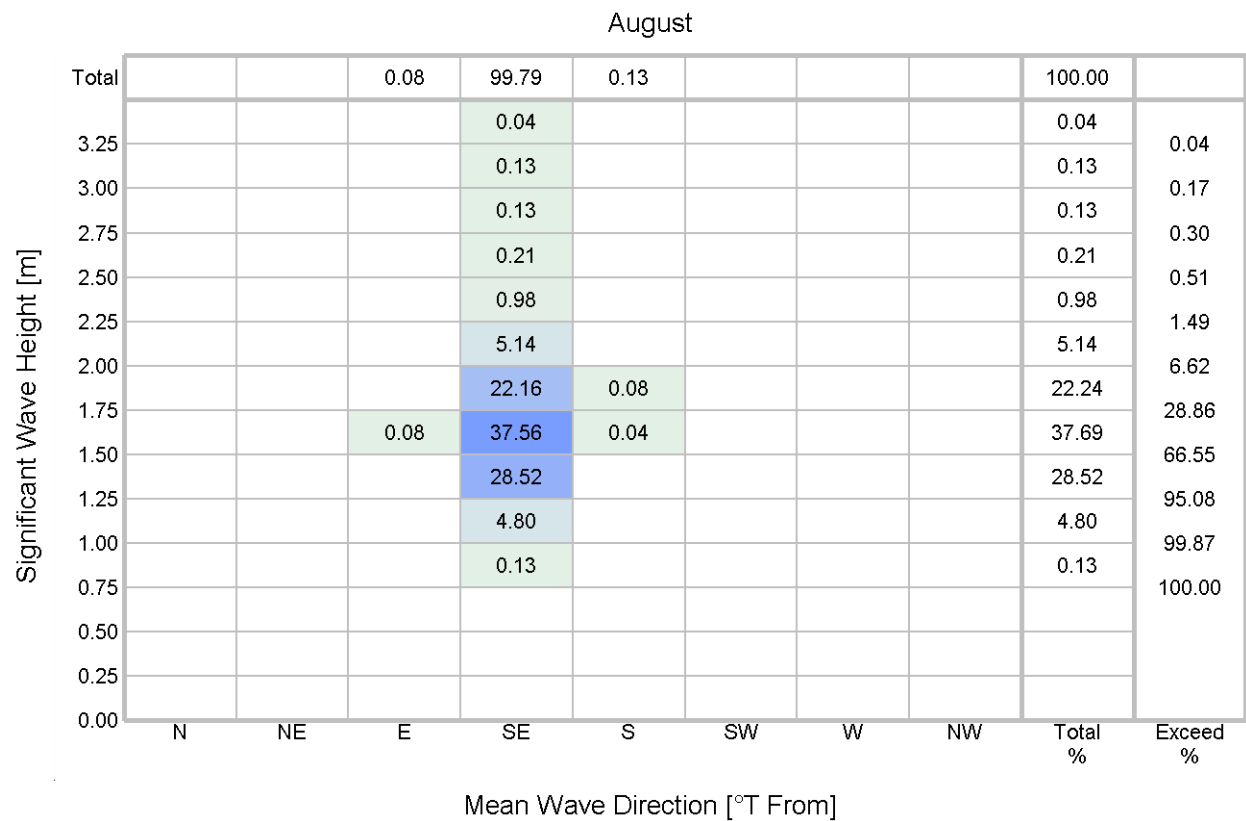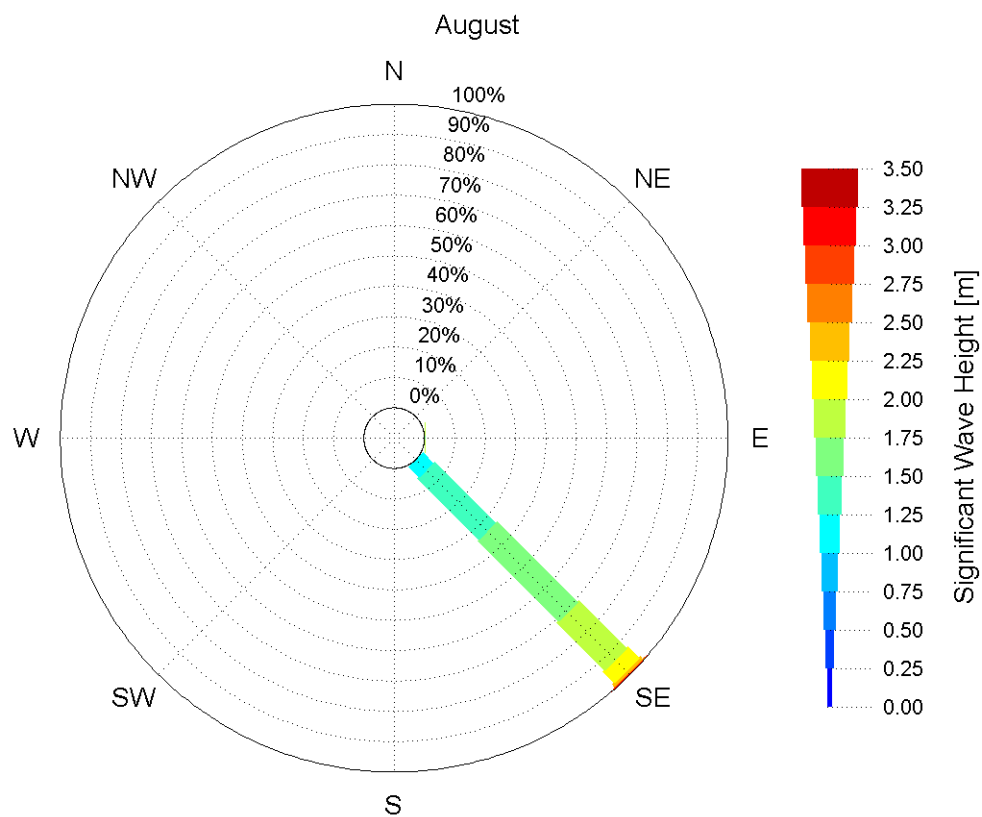

Figure 3.1.9: Percentage Occurrence of Hs and Mdir – August

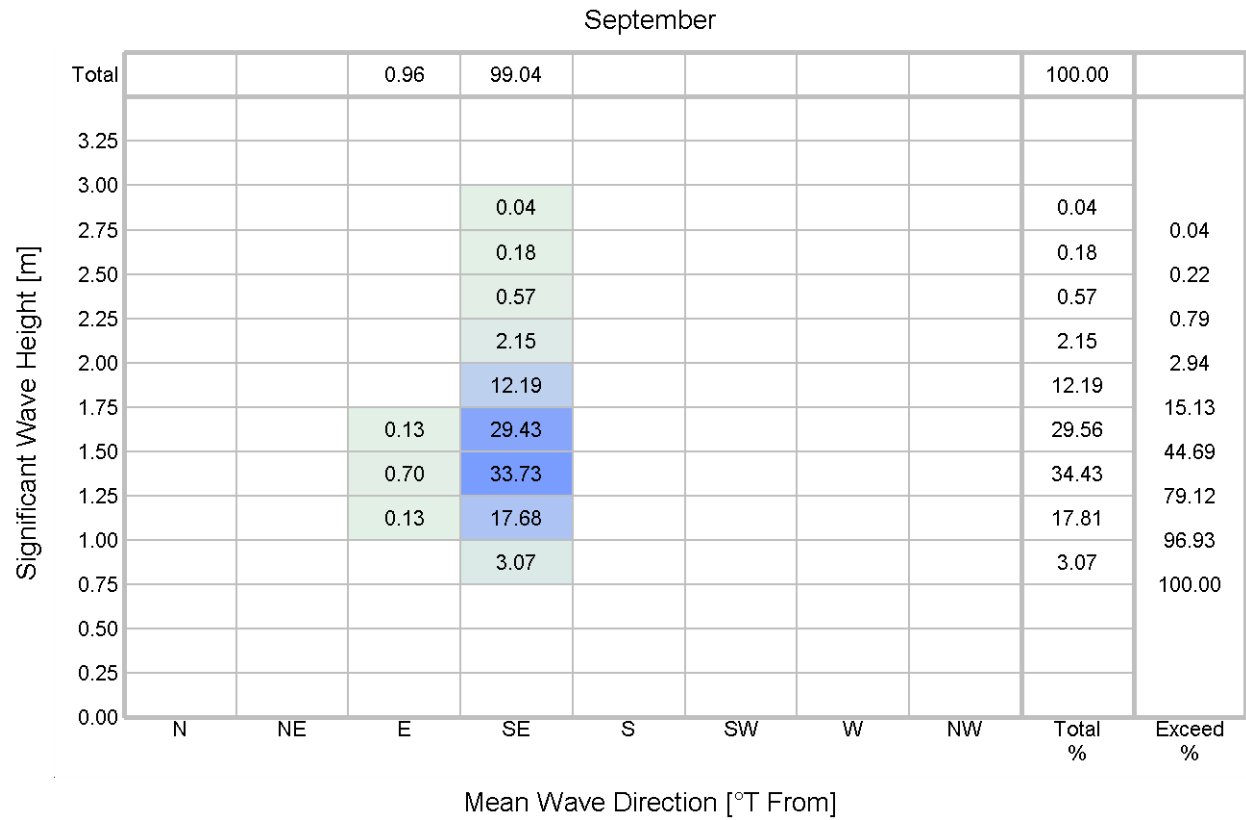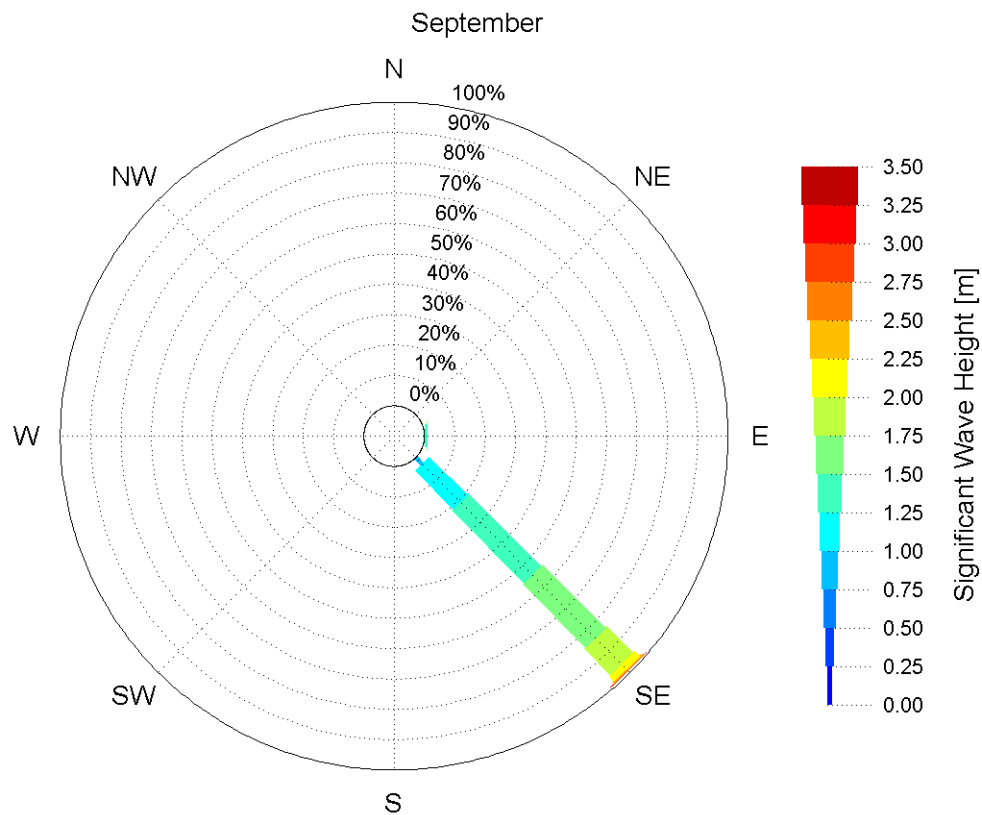

Figure 3.1.10: Percentage Occurrence of Hs and Mdir – September

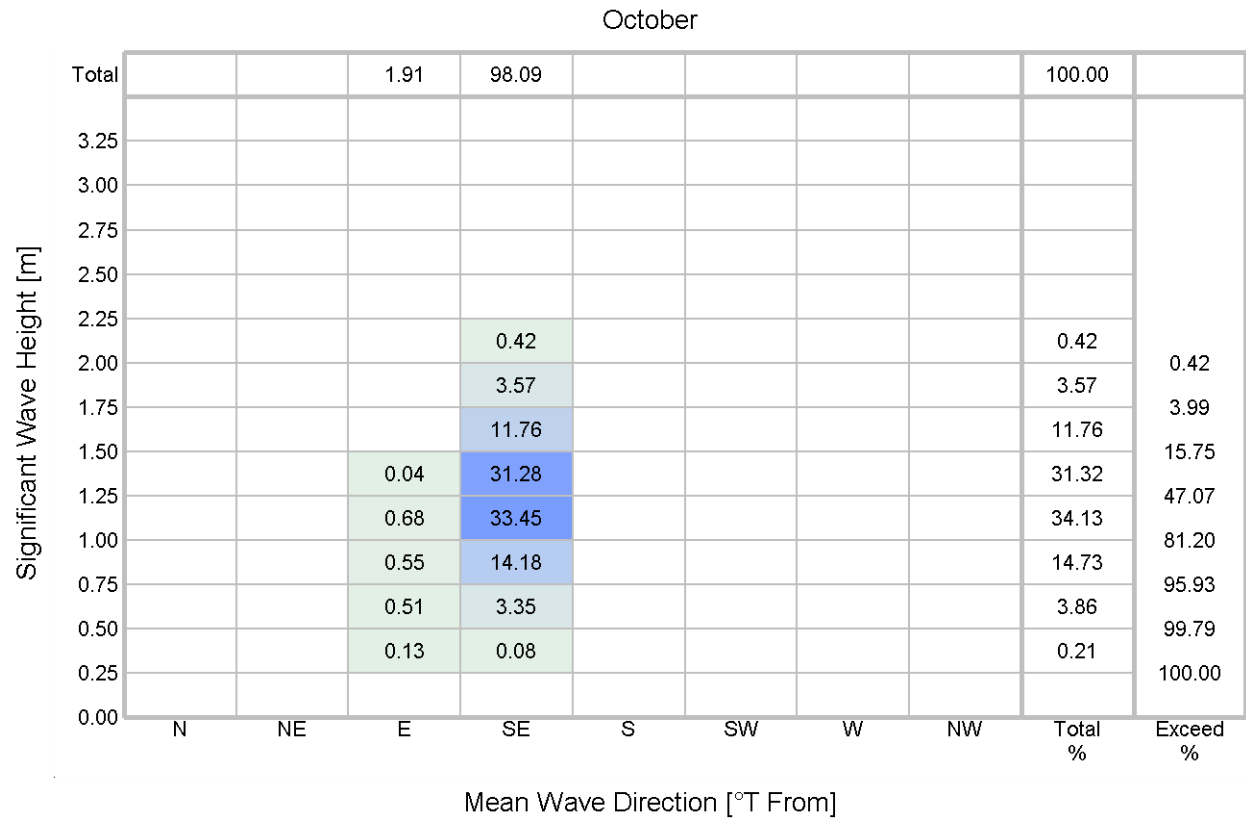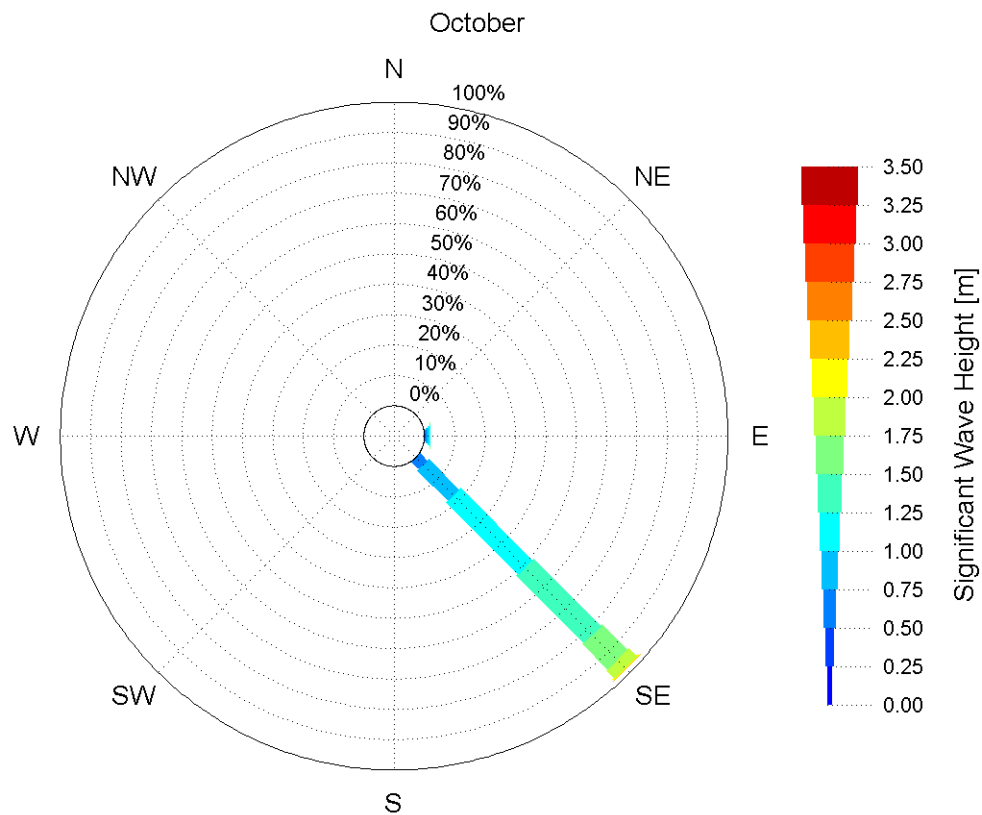

Figure 3.1.11: Percentage Occurrence of Hs and Mdir – October

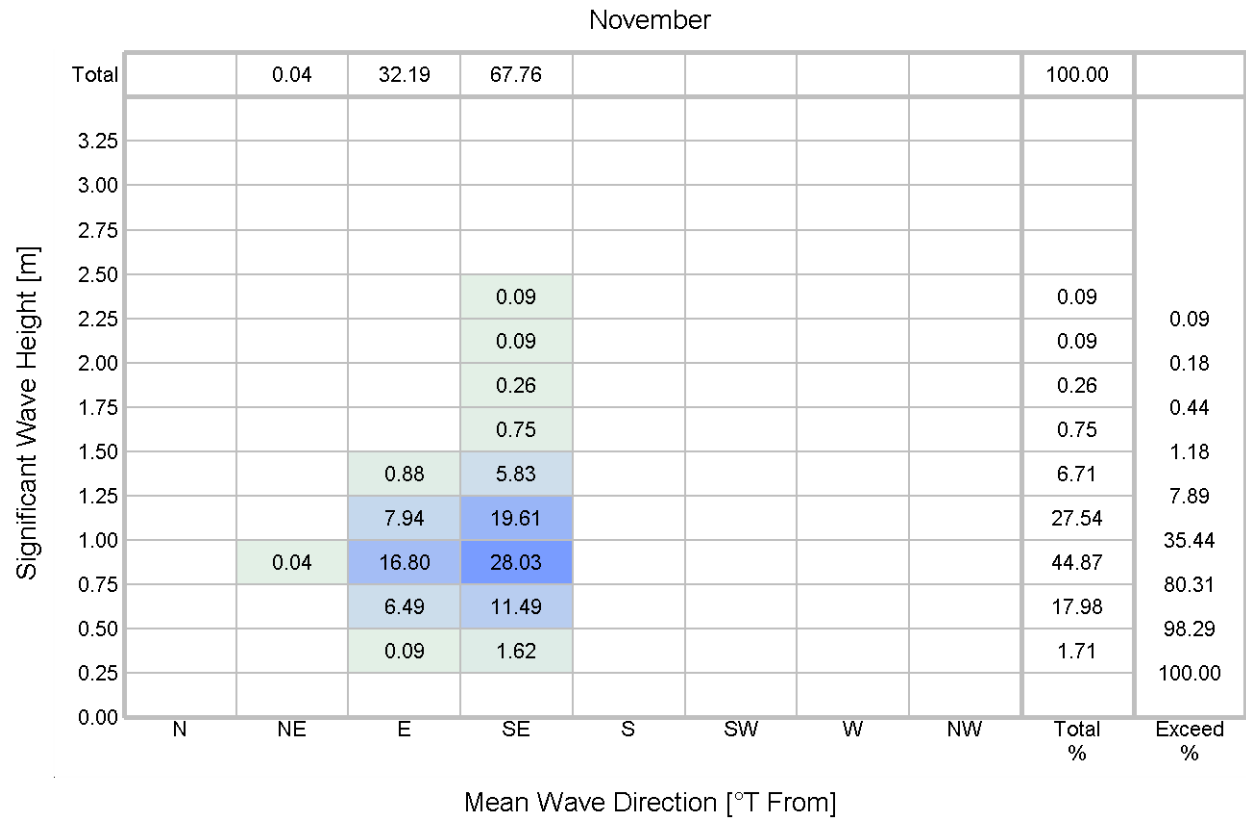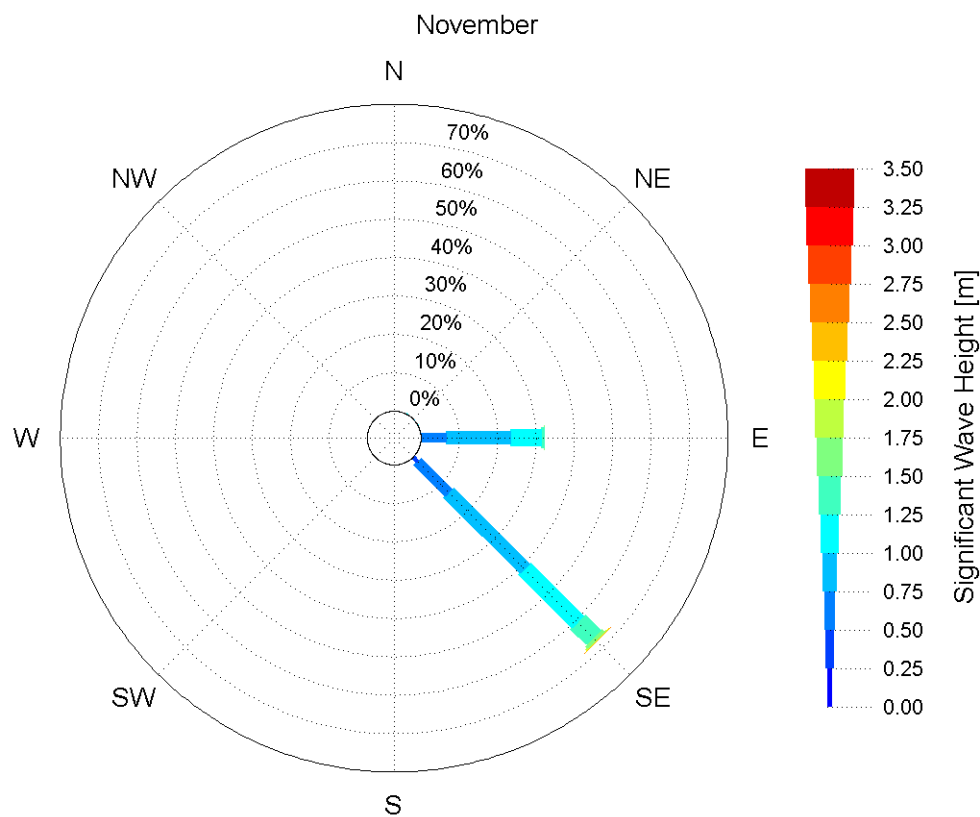

Figure 3.1.12: Percentage Occurrence of Hs and Mdir – November

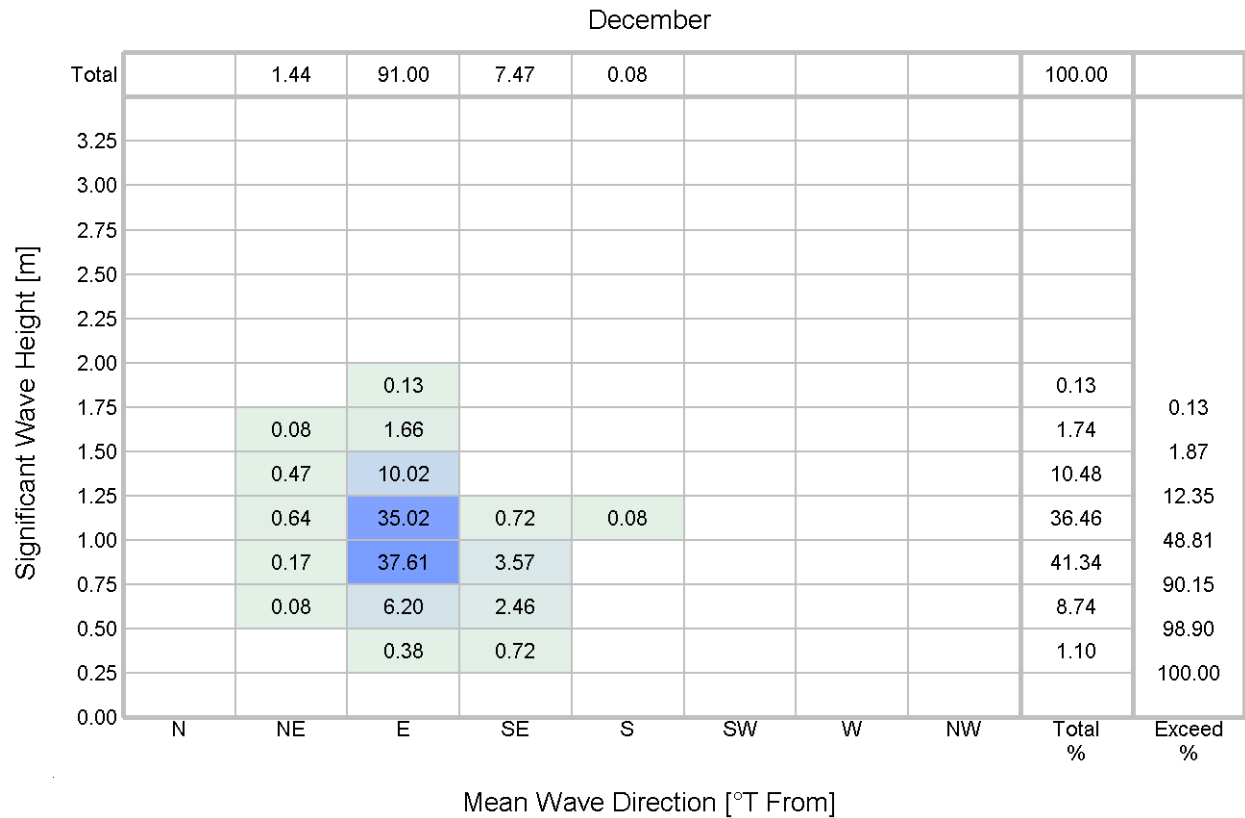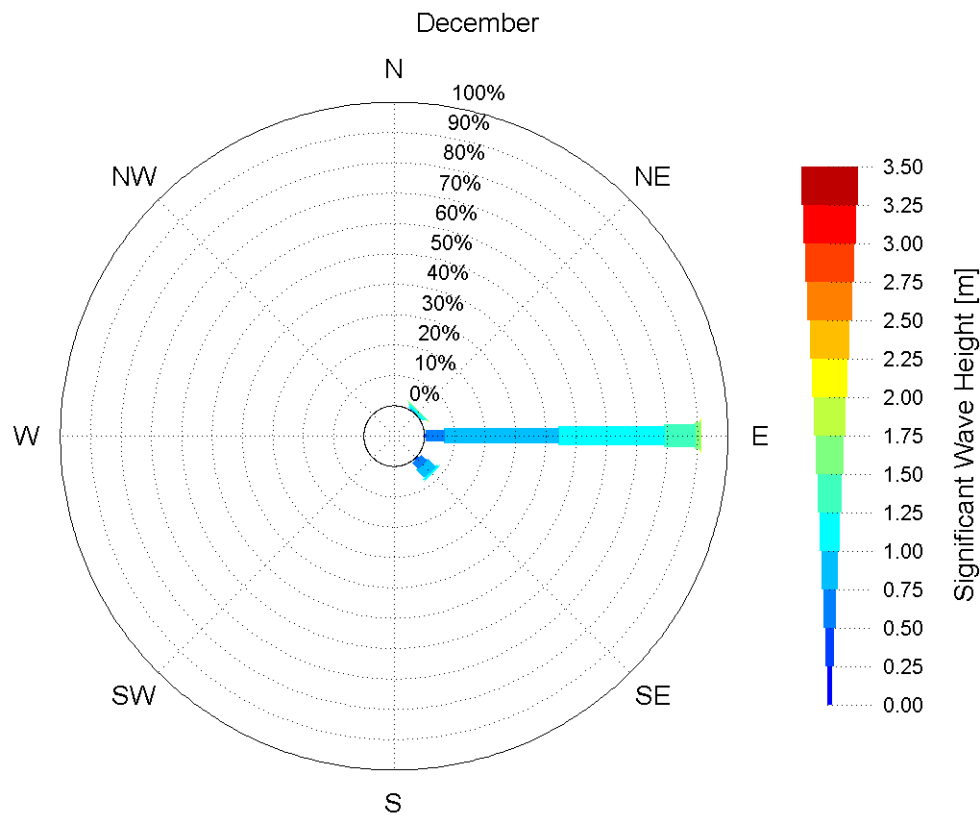

Figure 3.1.13: Percentage Occurrence of Hs and Mdir – December

### 3.2 Operational Wave Criteria – Hs and Te

The following figures are presented in this section:

Figure 3.2.1: Percentage Occurrence of Hs and Te – All-Year

Figure 3.2.2: Percentage Occurrence of Hs and Te – January

Figure 3.2.3: Percentage Occurrence of Hs and Te – February

Figure 3.2.4: Percentage Occurrence of Hs and Te – March

Figure 3.2.5: Percentage Occurrence of Hs and Te – April

Figure 3.2.6: Percentage Occurrence of Hs and Te – May

Figure 3.2.7: Percentage Occurrence of Hs and Te – June

Figure 3.2.8: Percentage Occurrence of Hs and Te – July

Figure 3.2.9: Percentage Occurrence of Hs and Te – August

Figure 3.2.10: Percentage Occurrence of Hs and Te – September

Figure 3.2.11: Percentage Occurrence of Hs and Te – October

Figure 3.2.12: Percentage Occurrence of Hs and Te – November

Figure 3.2.13: Percentage Occurrence of Hs and Te – December



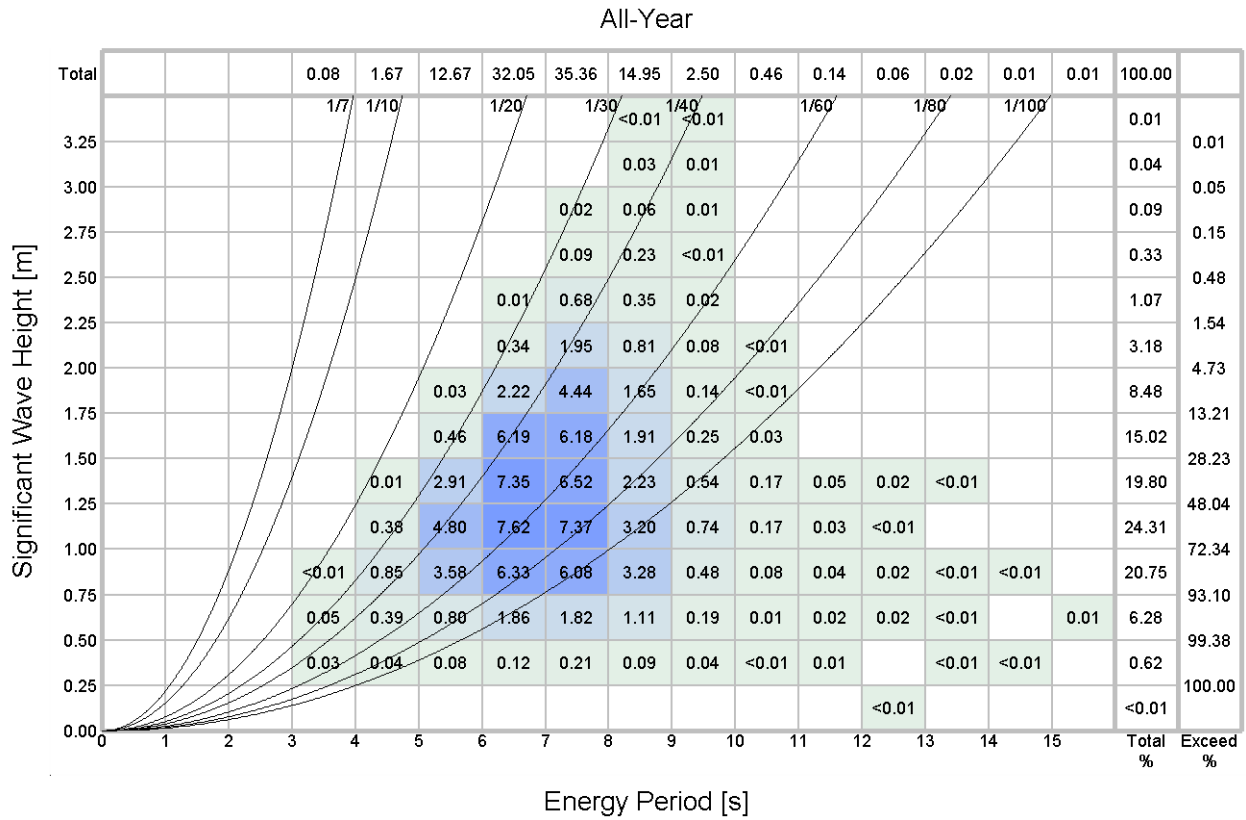

Figure 3.2.1: Percentage Occurrence of Hs and Te – All-Year

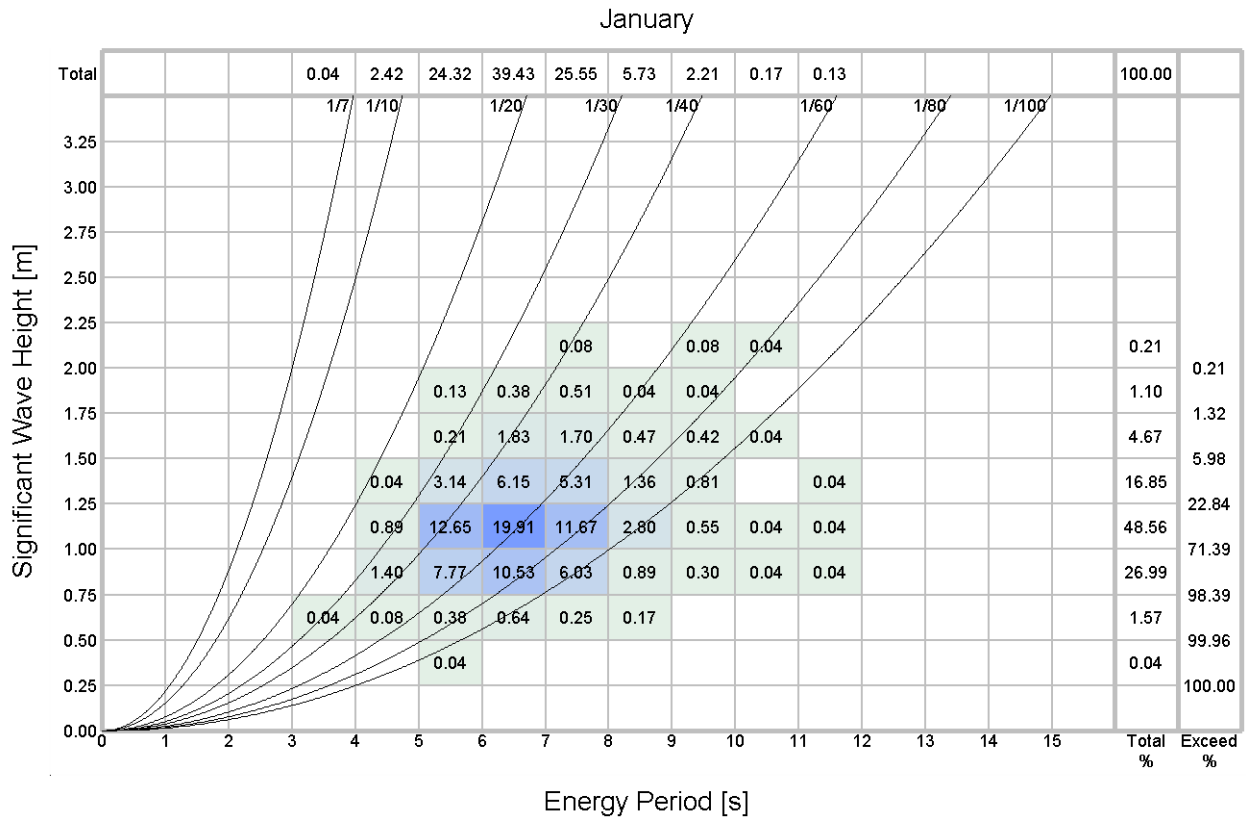

Figure 3.2.2: Percentage Occurrence of Hs and Te – January

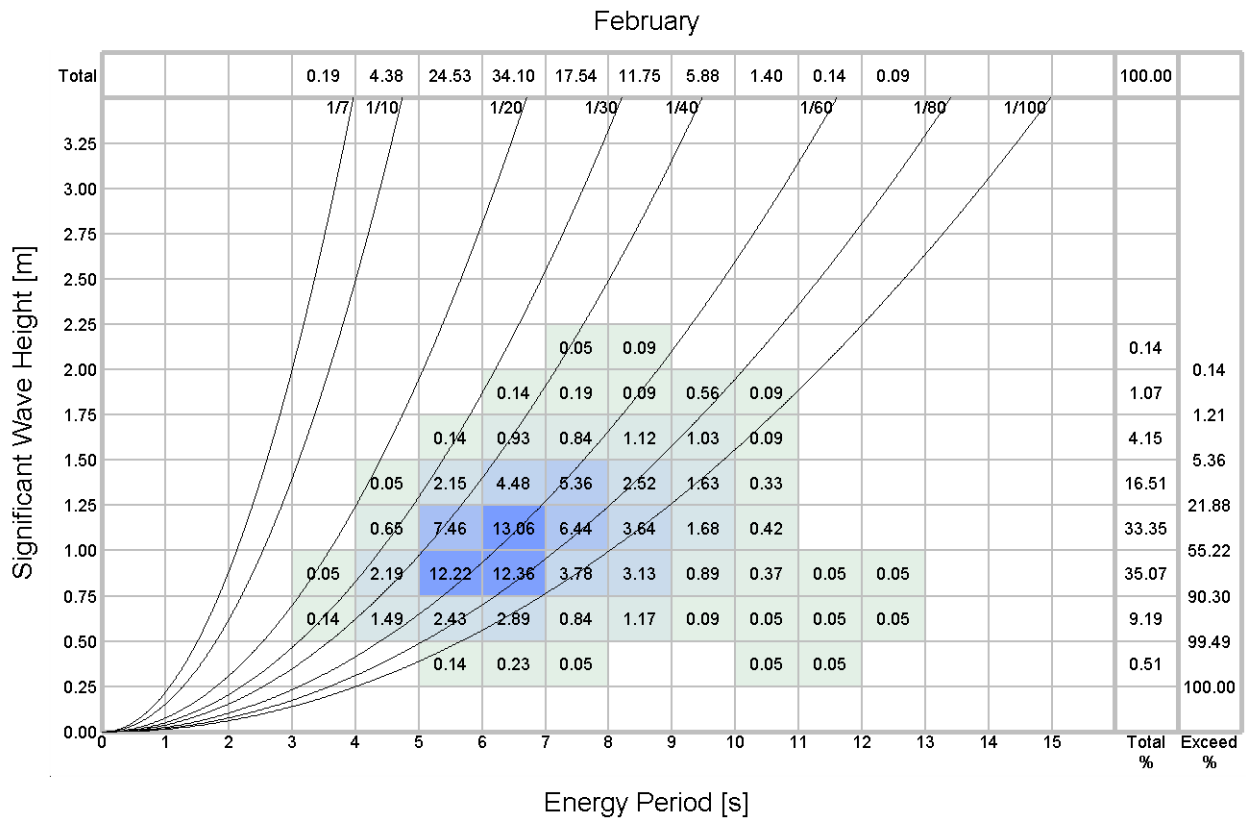

Figure 3.2.3: Percentage Occurrence of Hs and Te – February

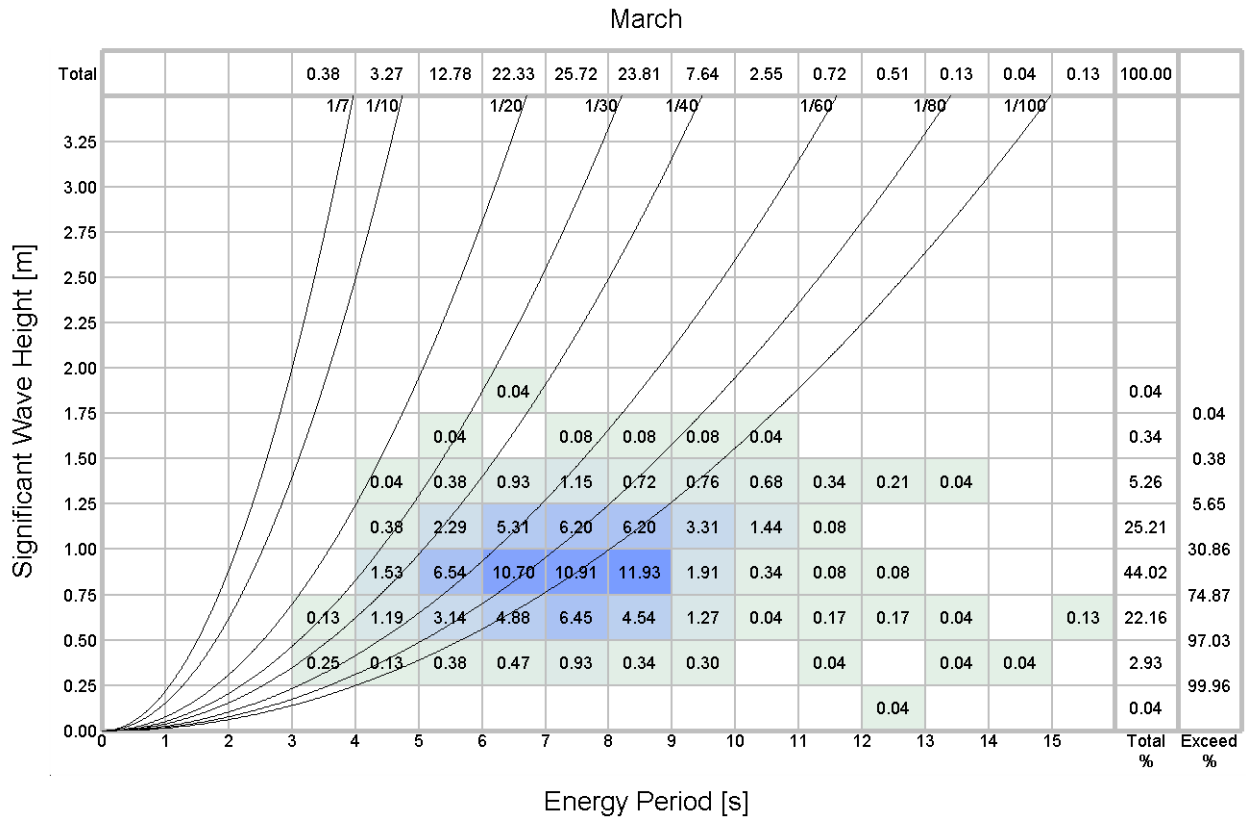

Figure 3.2.4: Percentage Occurrence of Hs and Te – March

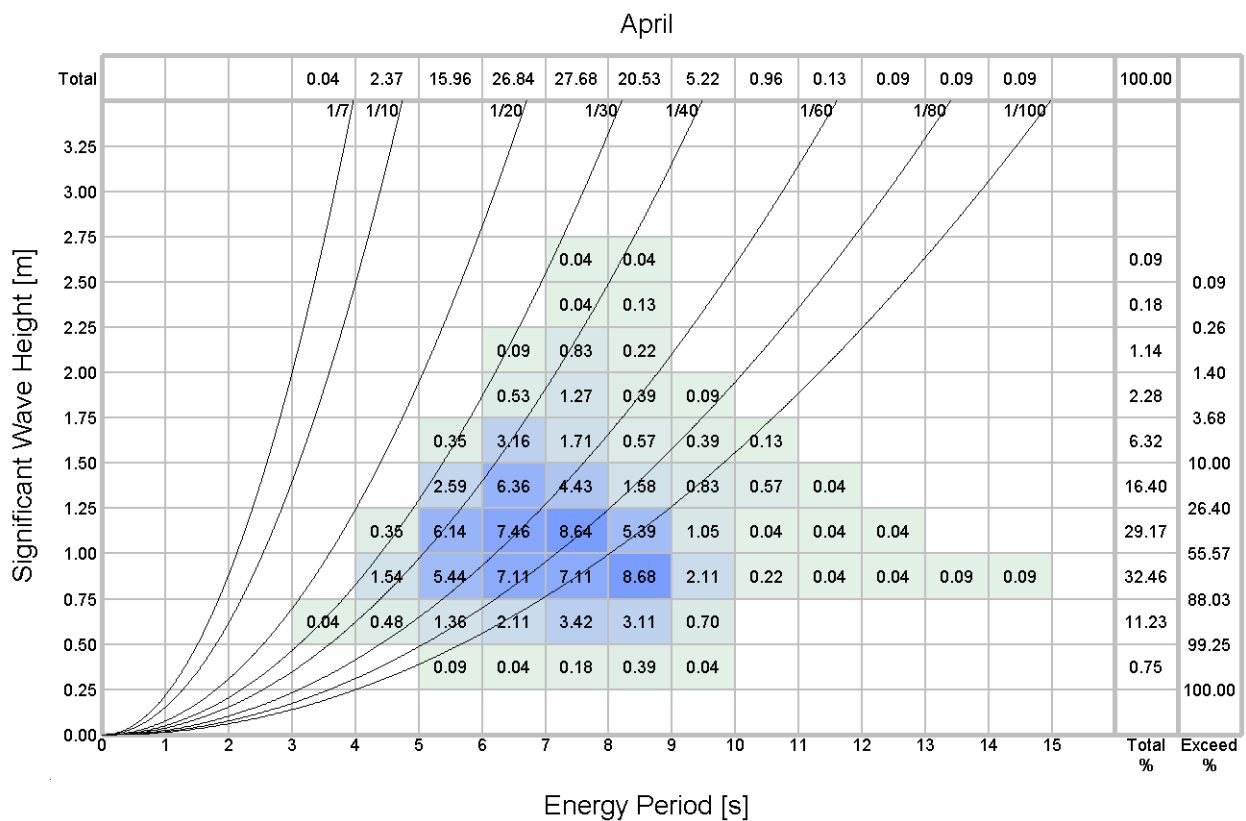

Figure 3.2.5: Percentage Occurrence of Hs and Te – April

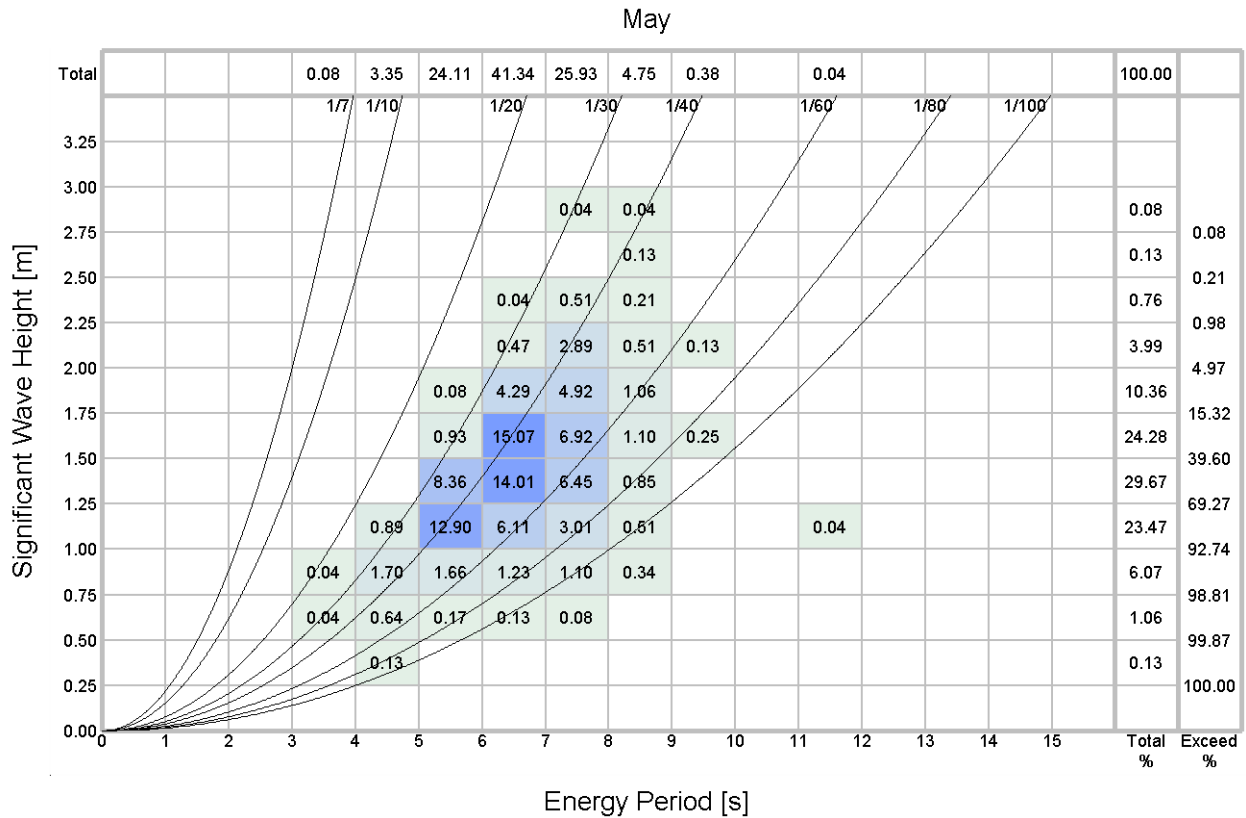

Figure 3.2.6: Percentage Occurrence of Hs and Te – May

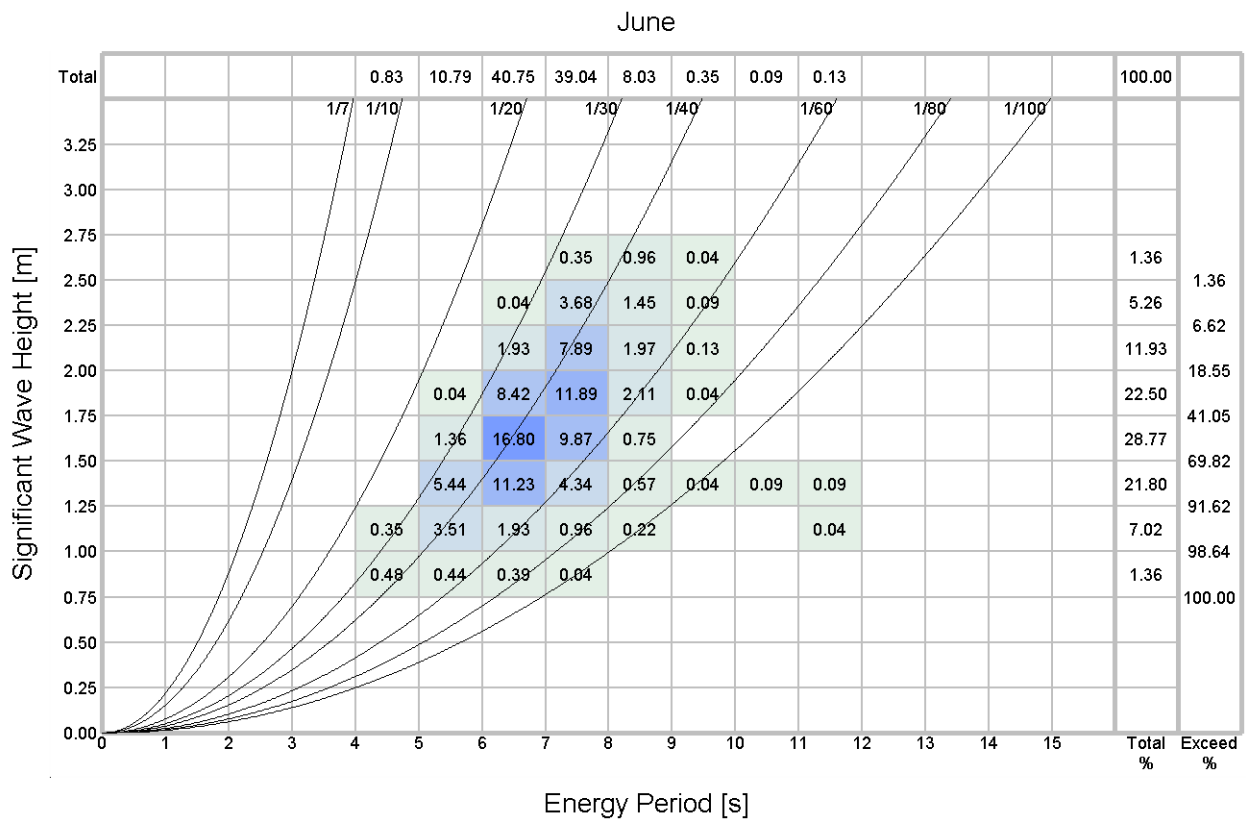

Figure 3.2.7: Percentage Occurrence of Hs and Te – June

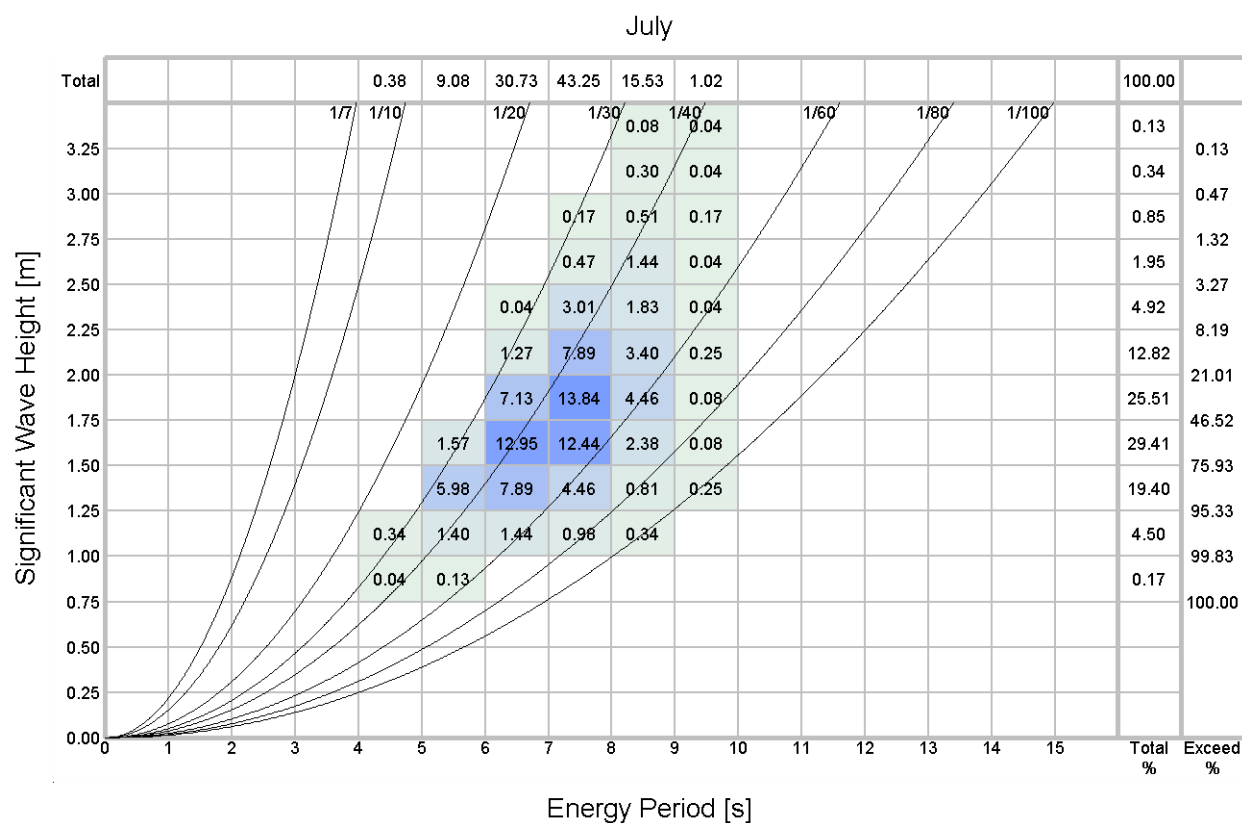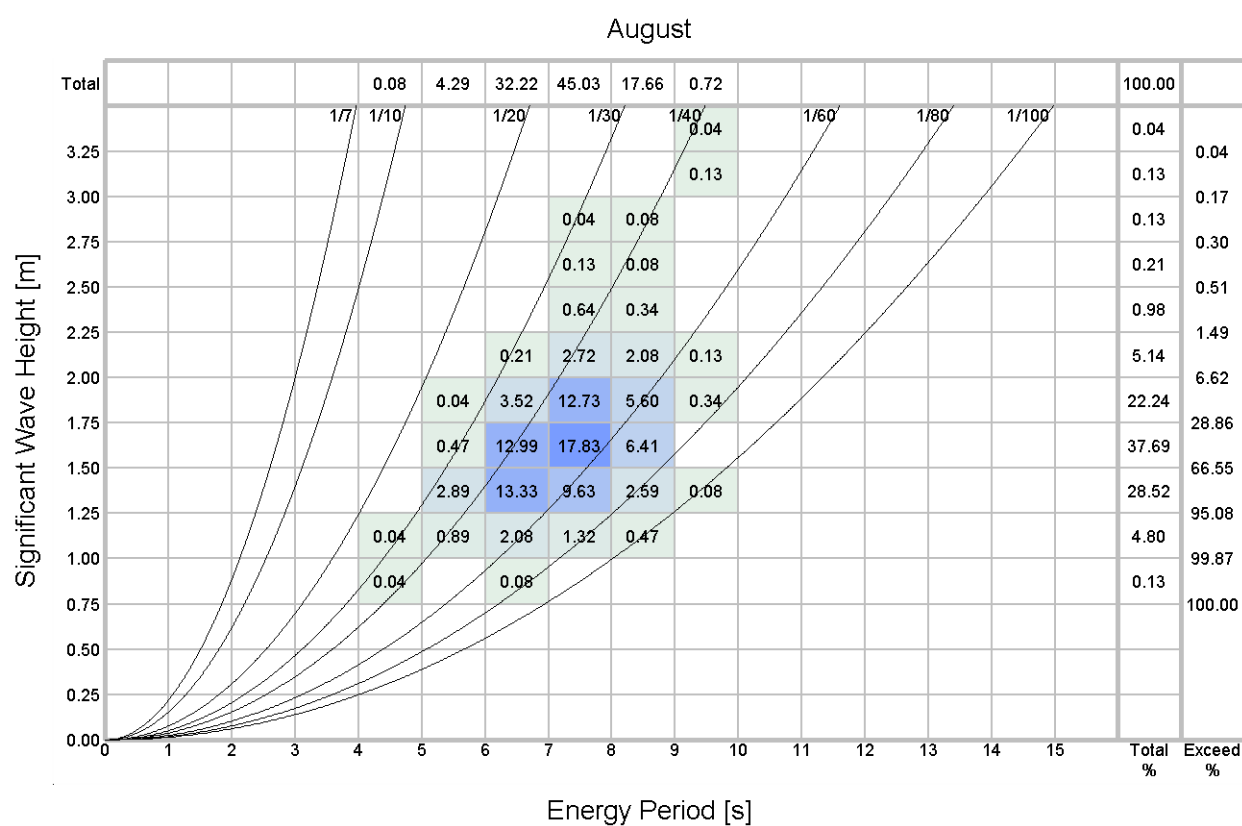

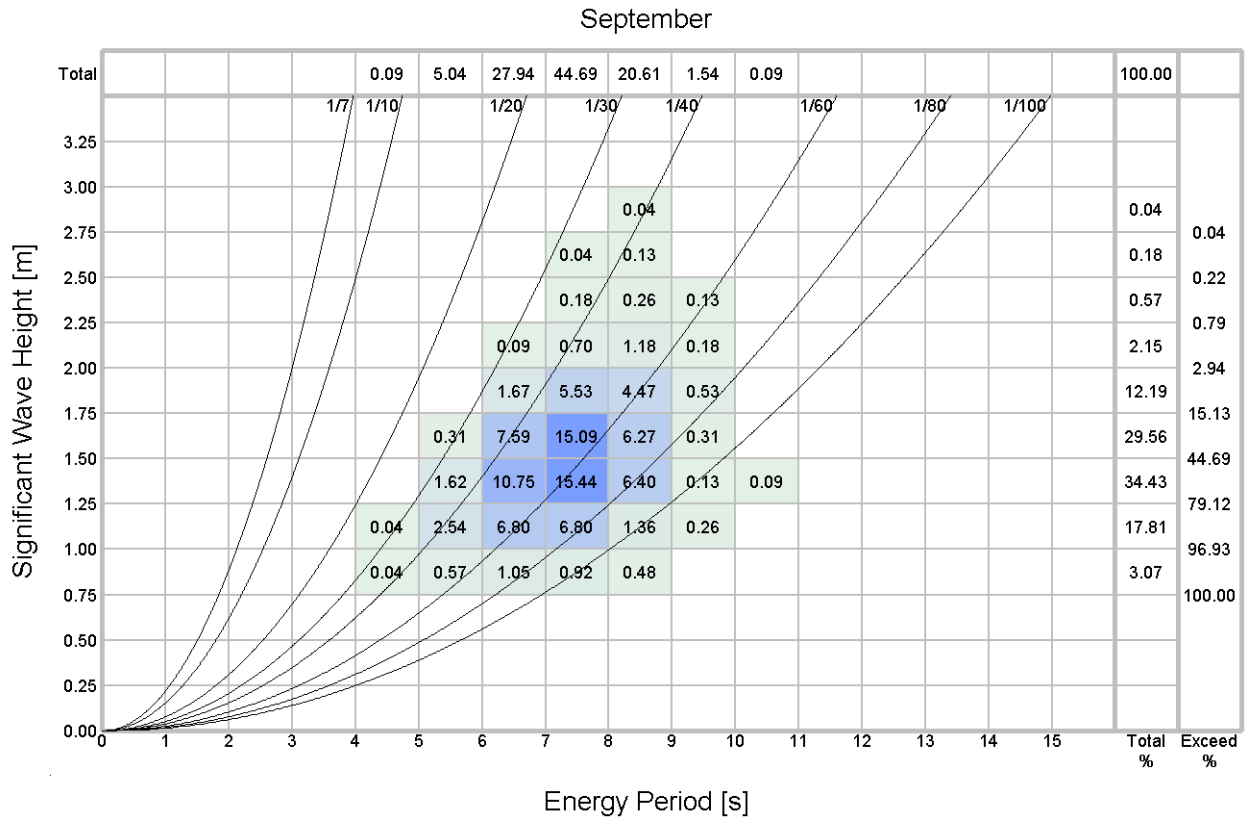

Figure 3.2.10: Percentage Occurrence of Hs and Te – September

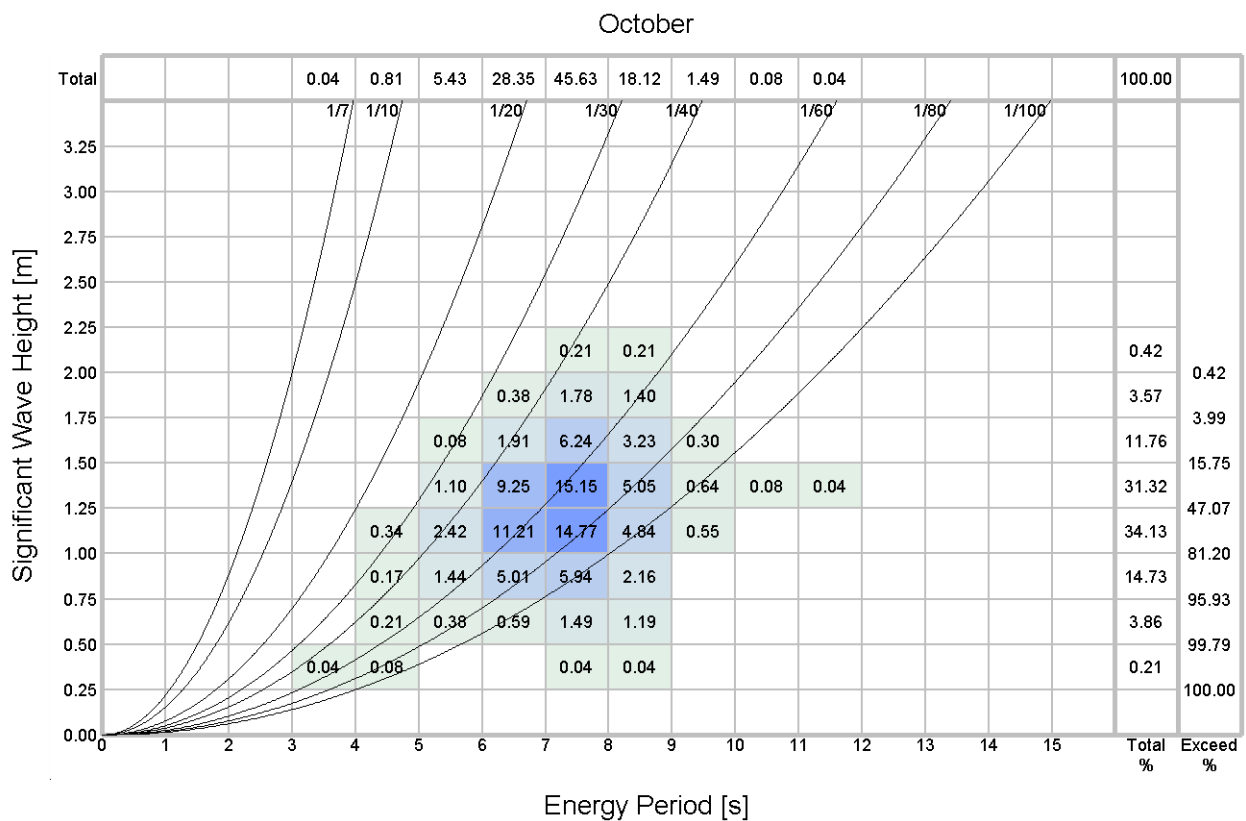

Figure 3.2.11: Percentage Occurrence of Hs and Te – October

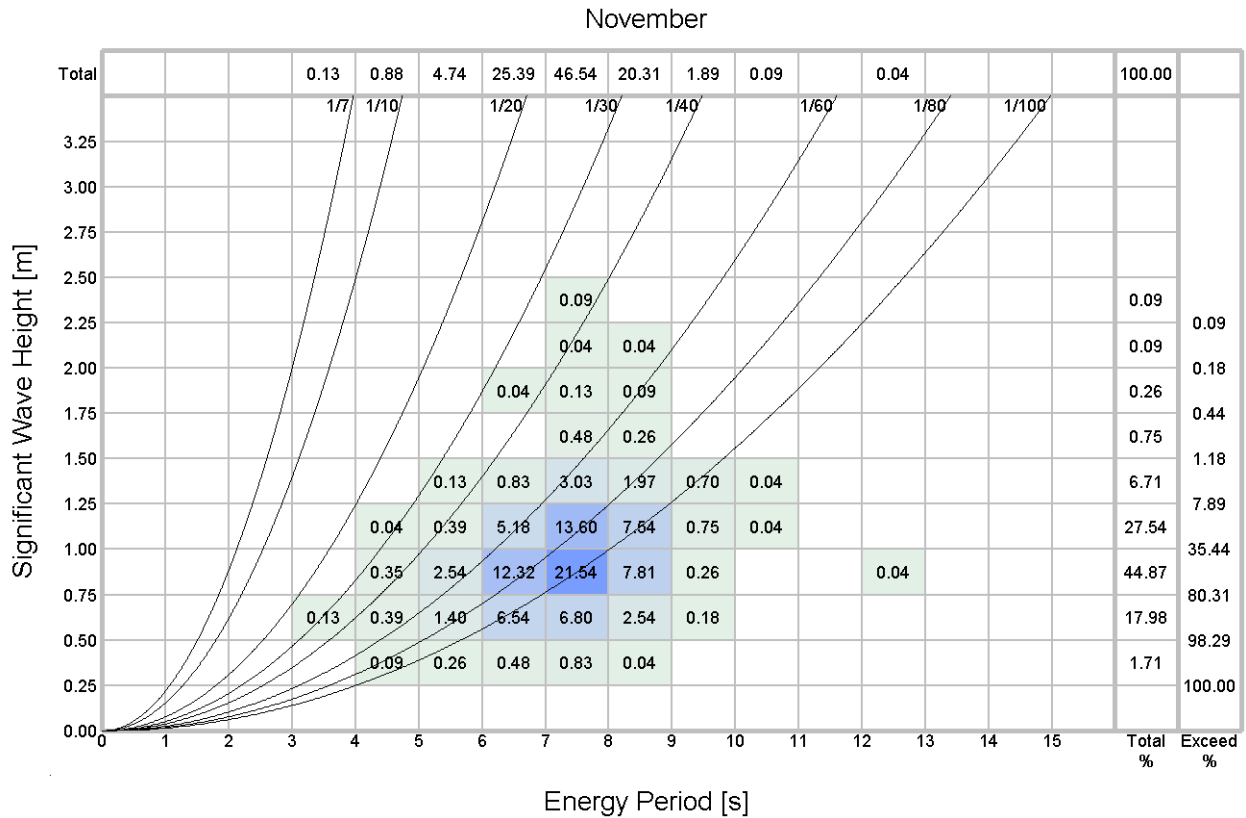

Figure 3.2.12: Percentage Occurrence of Hs and Te – November

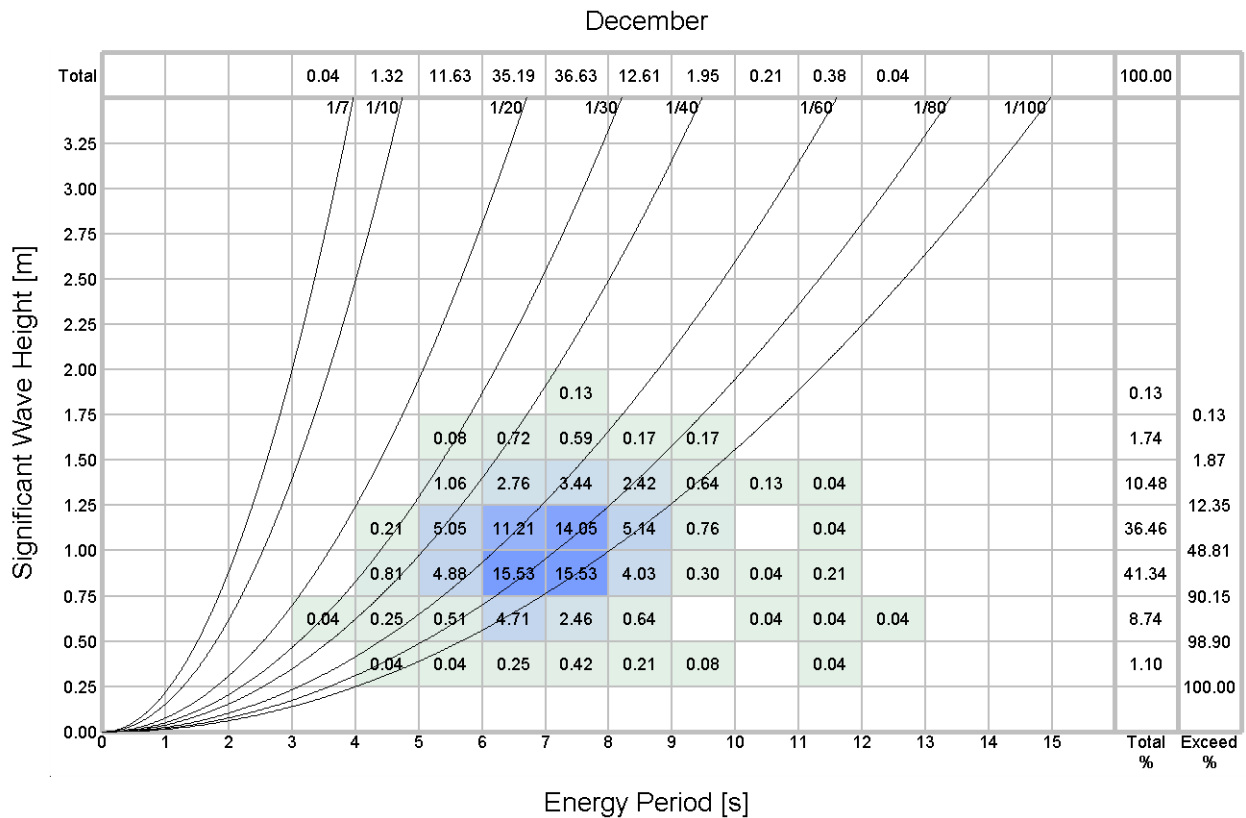

Figure 3.2.13: Percentage Occurrence of Hs and Te – December

### 3.3 Operational Wave Criteria – Hs and Tp

The following figures are presented in this section:

Figure 3.3.1: Percentage Occurrence of Hs and Tp - All-Year

Figure 3.3.2: Percentage Occurrence of Hs and Tp – January

Figure 3.3.3: Percentage Occurrence of Hs and Tp – February

Figure 3.3.4: Percentage Occurrence of Hs and Tp – March

Figure 3.3.5: Percentage Occurrence of Hs and Tp – April

Figure 3.3.6: Percentage Occurrence of Hs and Tp – May

Figure 3.3.7: Percentage Occurrence of Hs and Tp – June

Figure 3.3.8: Percentage Occurrence of Hs and Tp – July

Figure 3.3.9: Percentage Occurrence of Hs and Tp – August

Figure 3.3.10: Percentage Occurrence of Hs and Tp – September

Figure 3.3.11: Percentage Occurrence of Hs and Tp – October

Figure 3.3.12: Percentage Occurrence of Hs and Tp – November

Figure 3.3.13: Percentage Occurrence of Hs and Tp – December



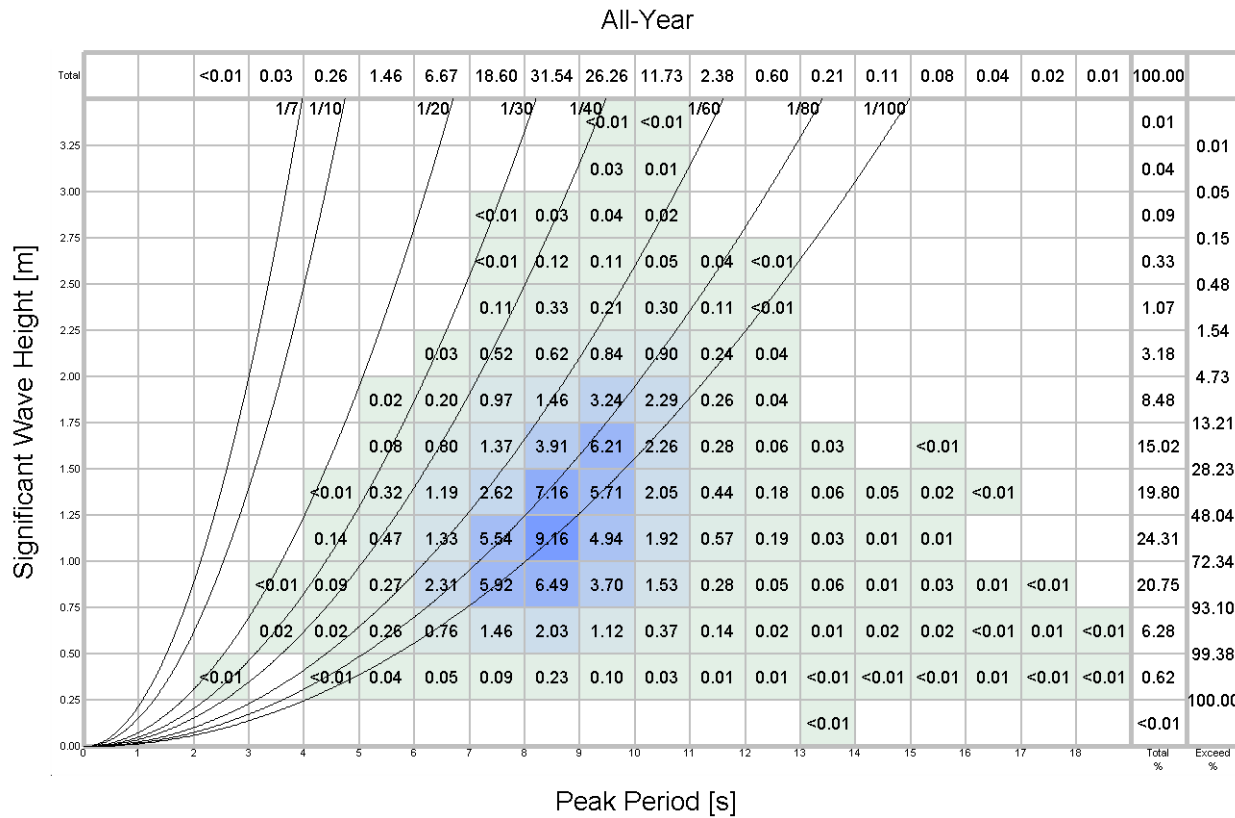

**Figure 3.3.1: Percentage Occurrence of Hs and Tp - All-Year**

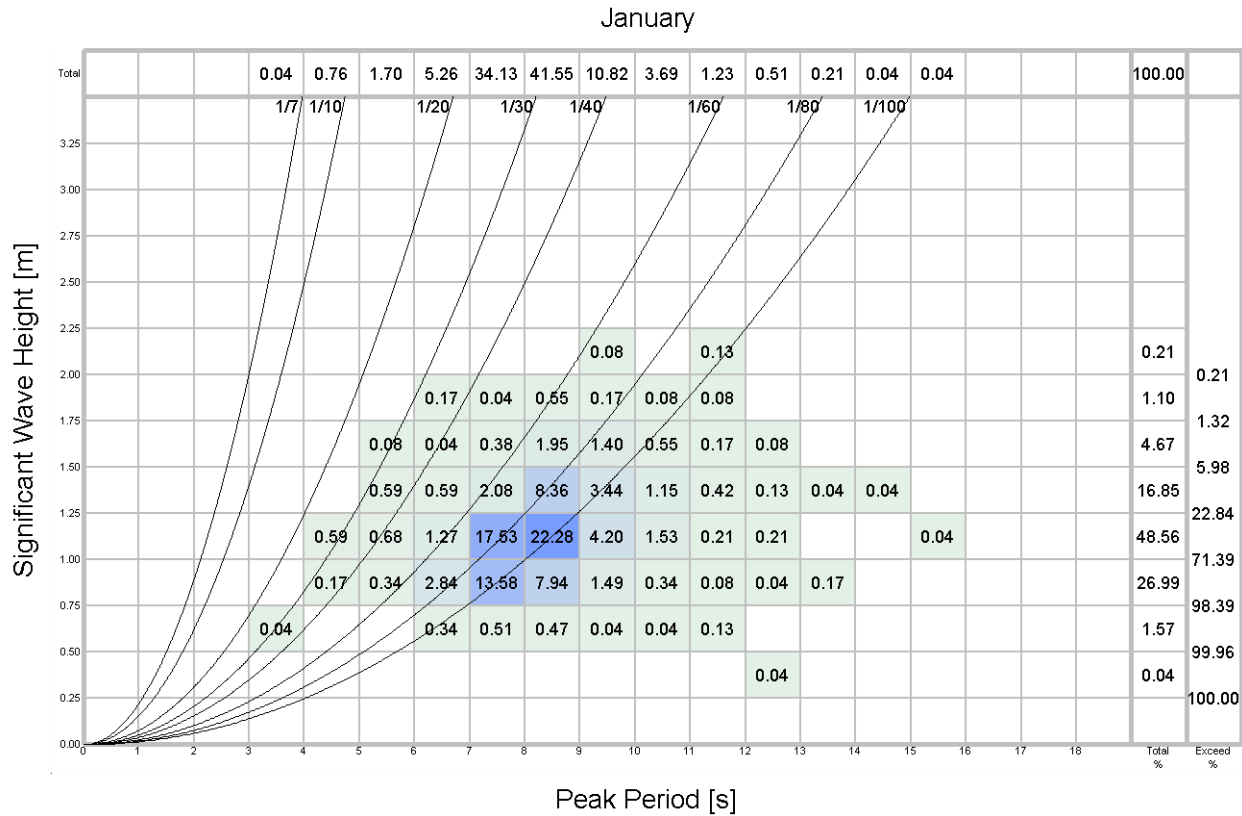

Figure 3.3.2: Percentage Occurrence of Hs and Tp – January

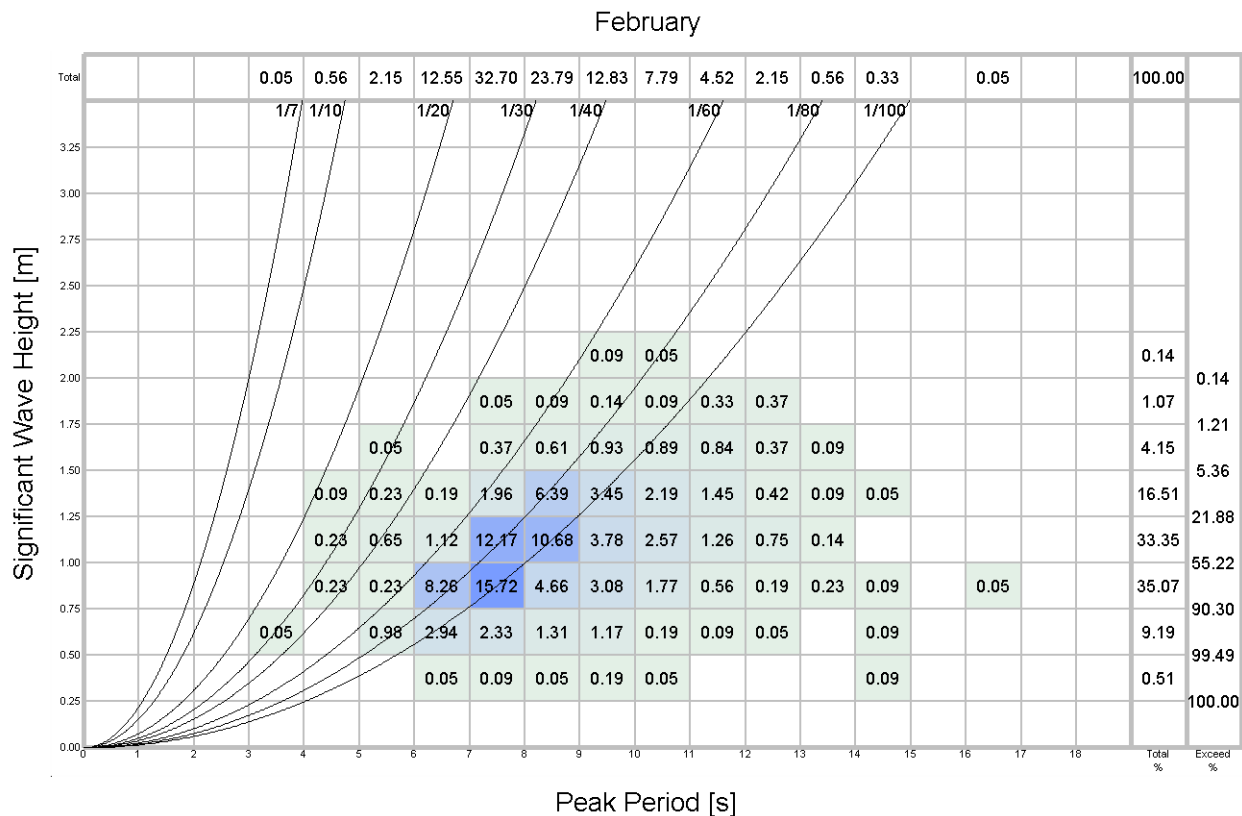

Figure 3.3.3: Percentage Occurrence of Hs and Tp – February

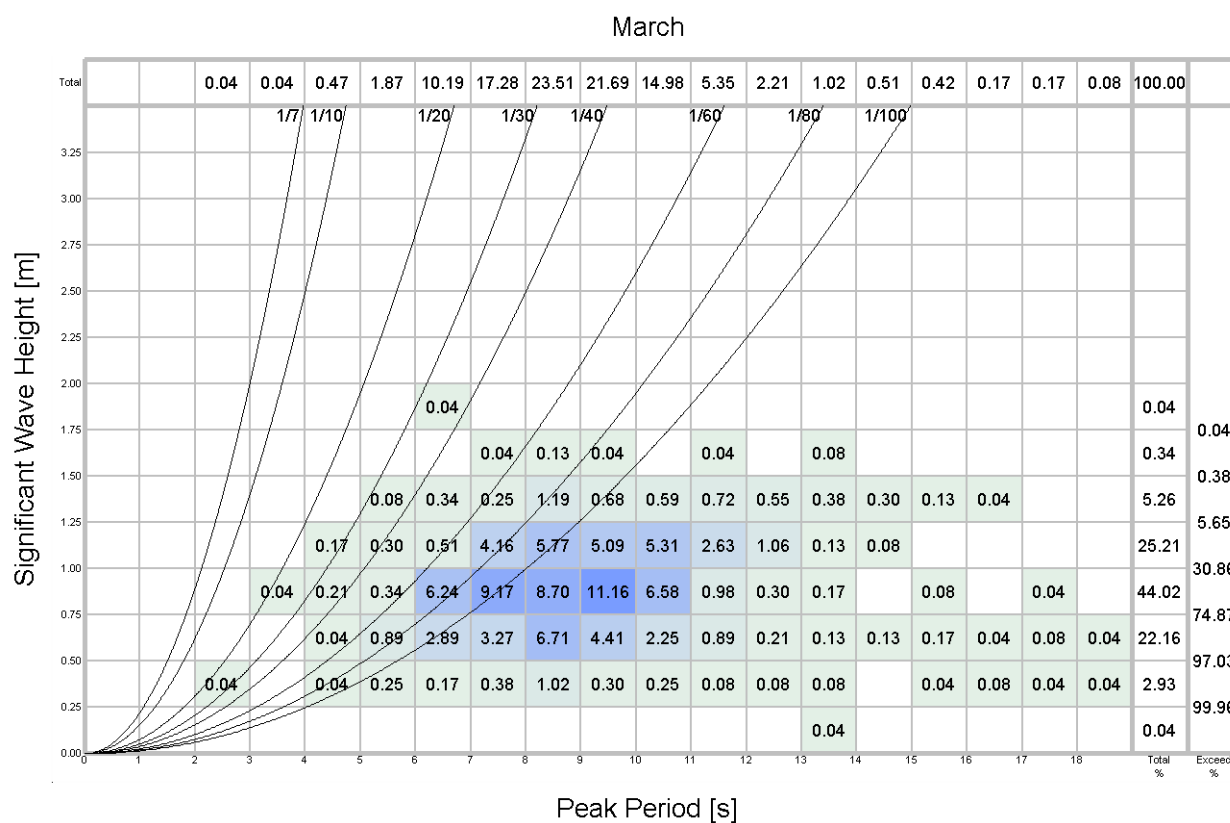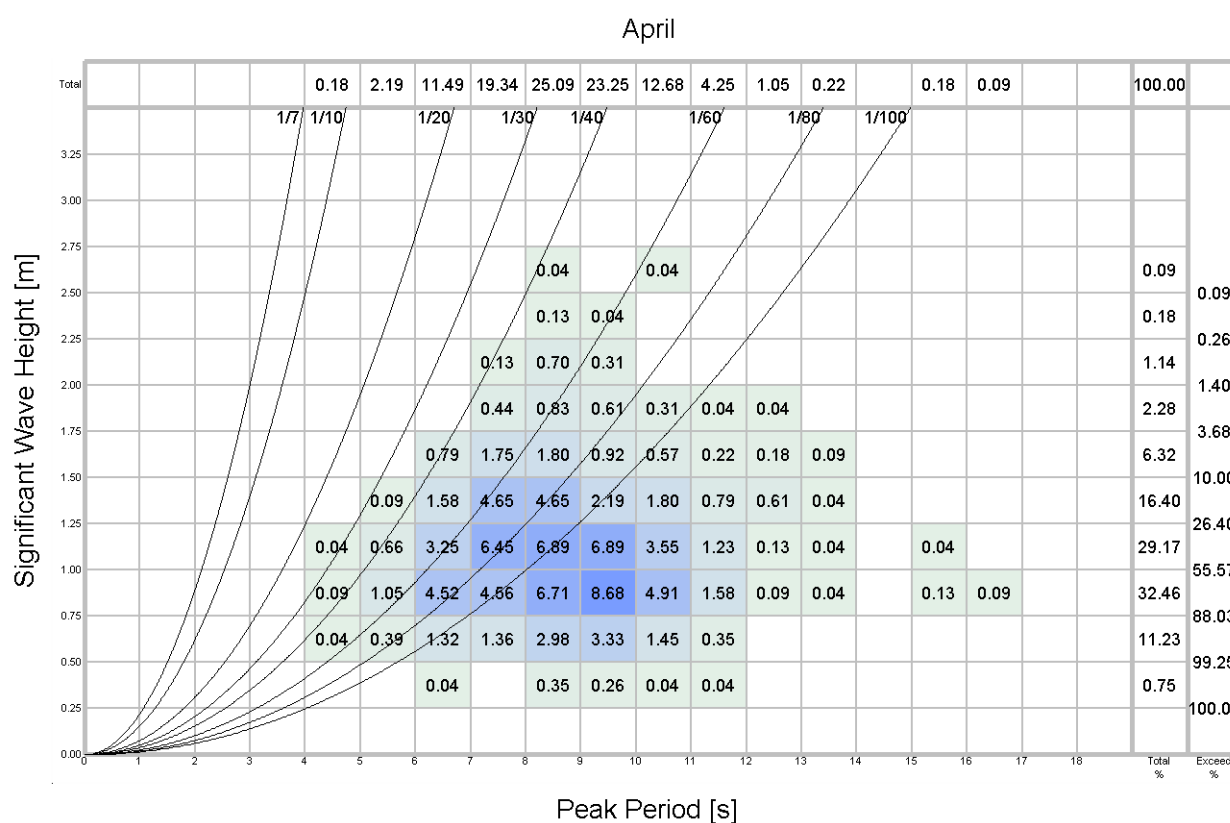

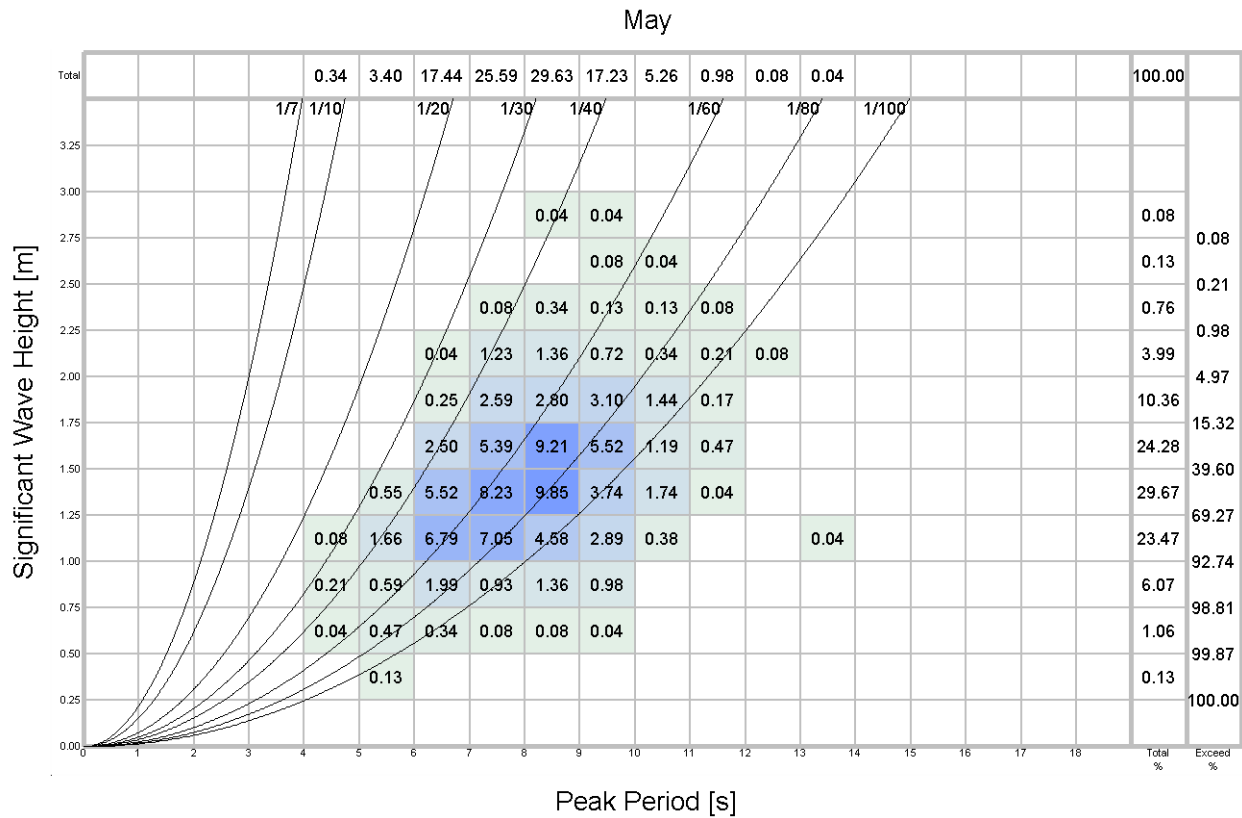

Figure 3.3.6: Percentage Occurrence of Hs and Tp – May

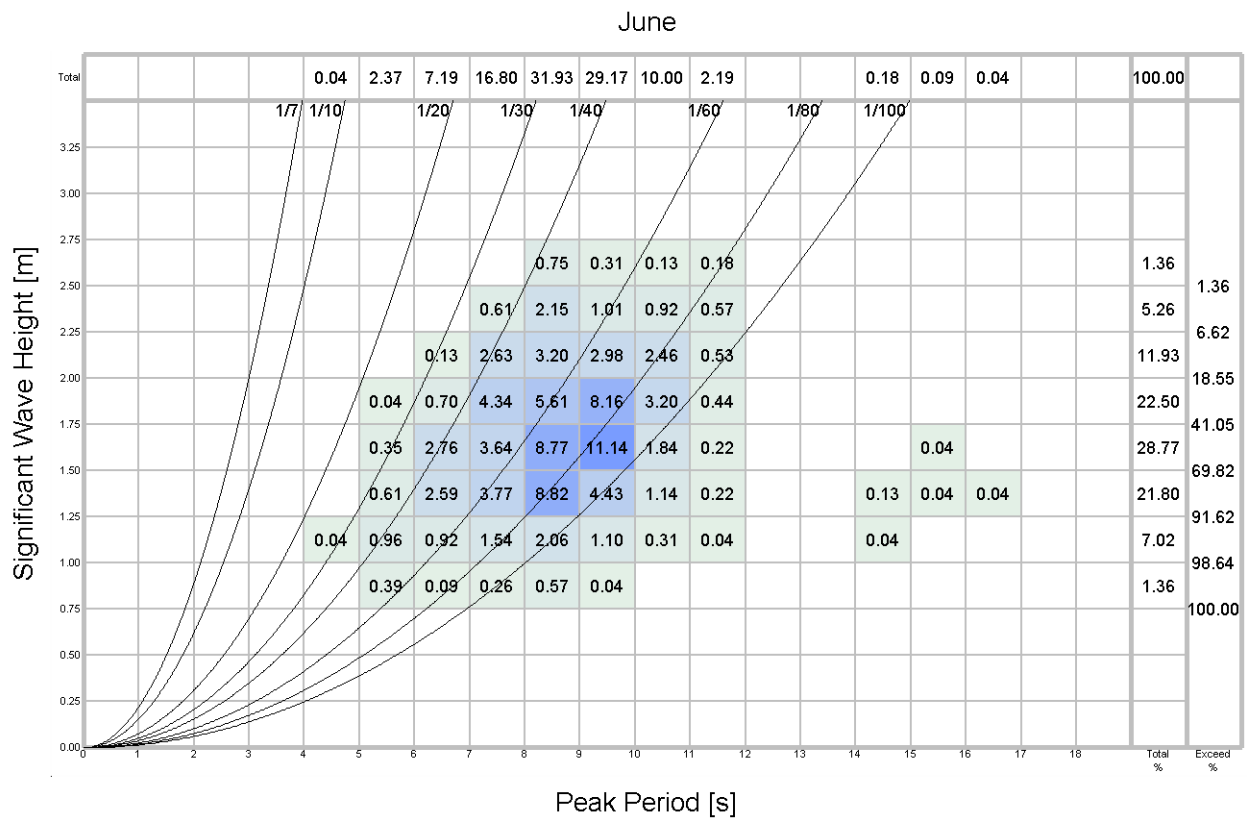

Figure 3.3.7: Percentage Occurrence of Hs and Tp – June

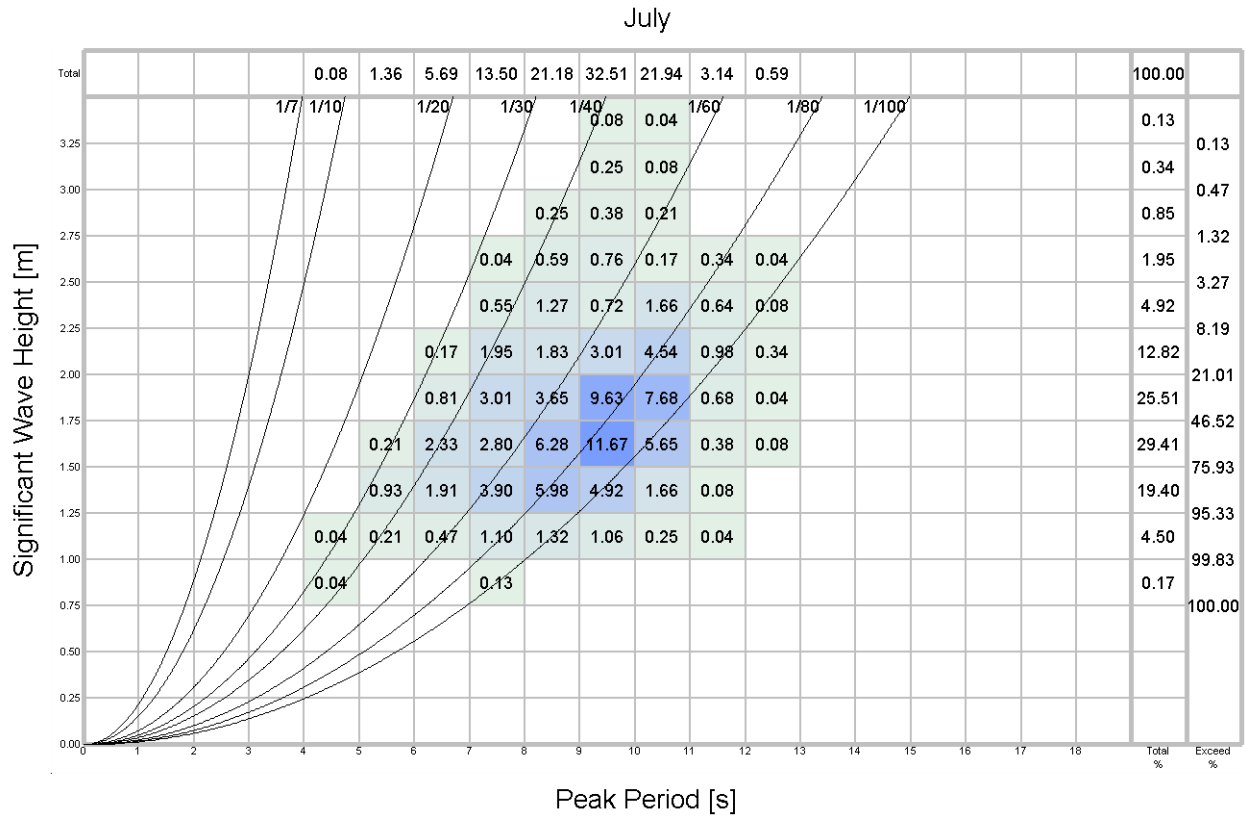

Figure 3.3.8: Percentage Occurrence of Hs and Tp – July

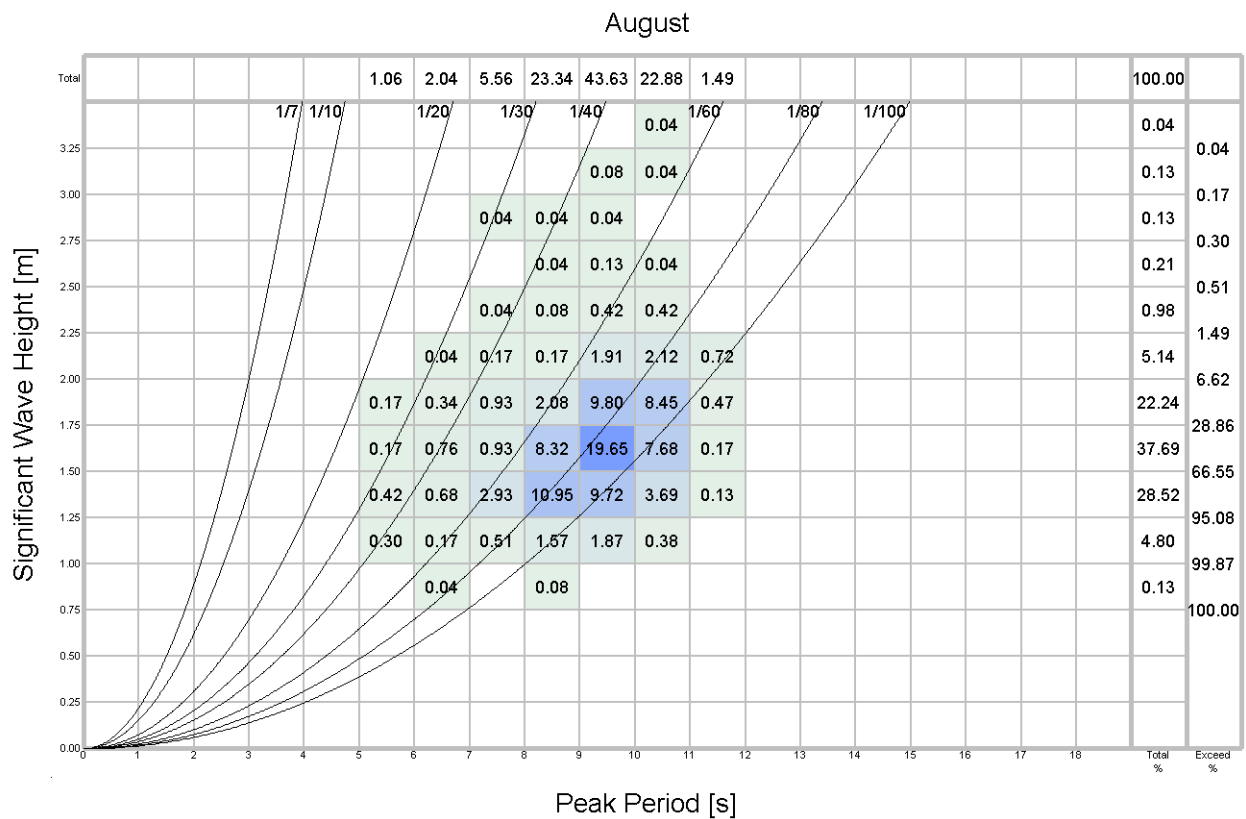

Figure 3.3.9: Percentage Occurrence of Hs and Tp – August

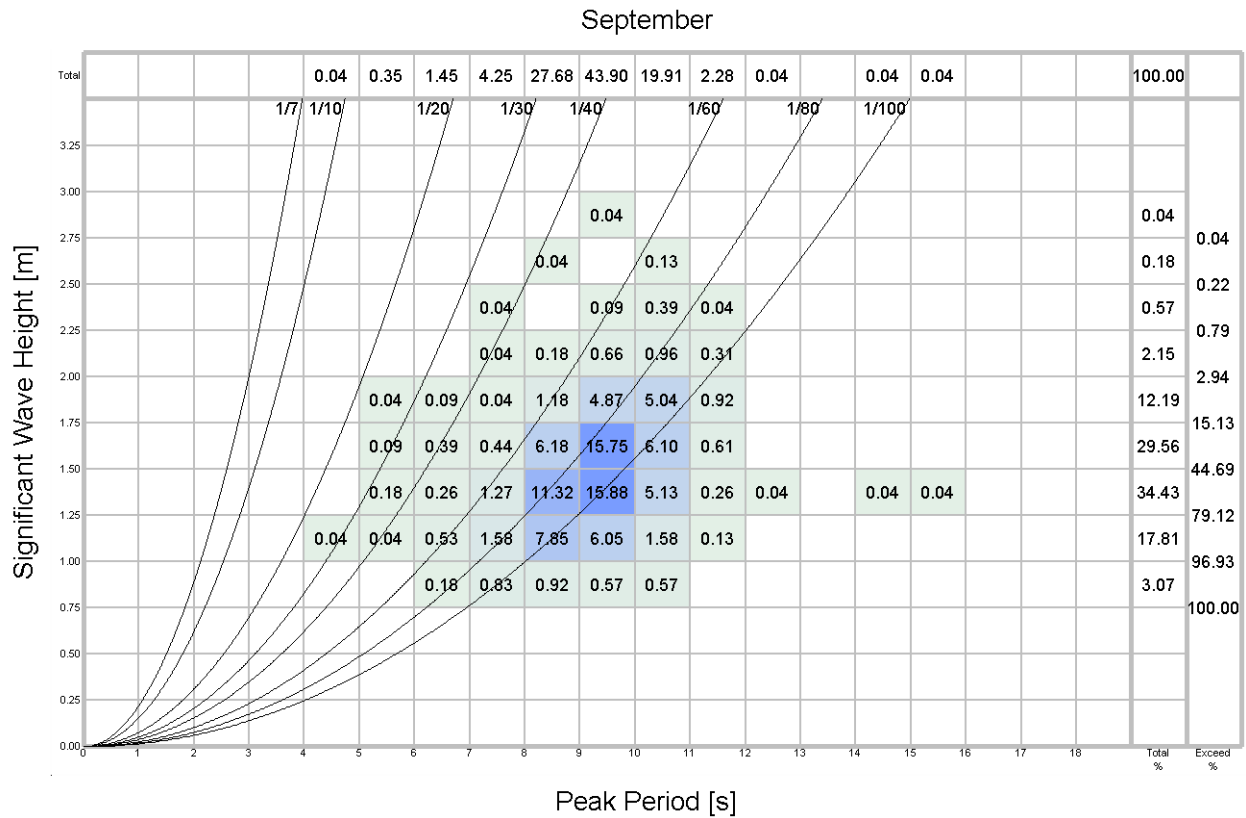

Figure 3.3.10: Percentage Occurrence of Hs and Tp – September

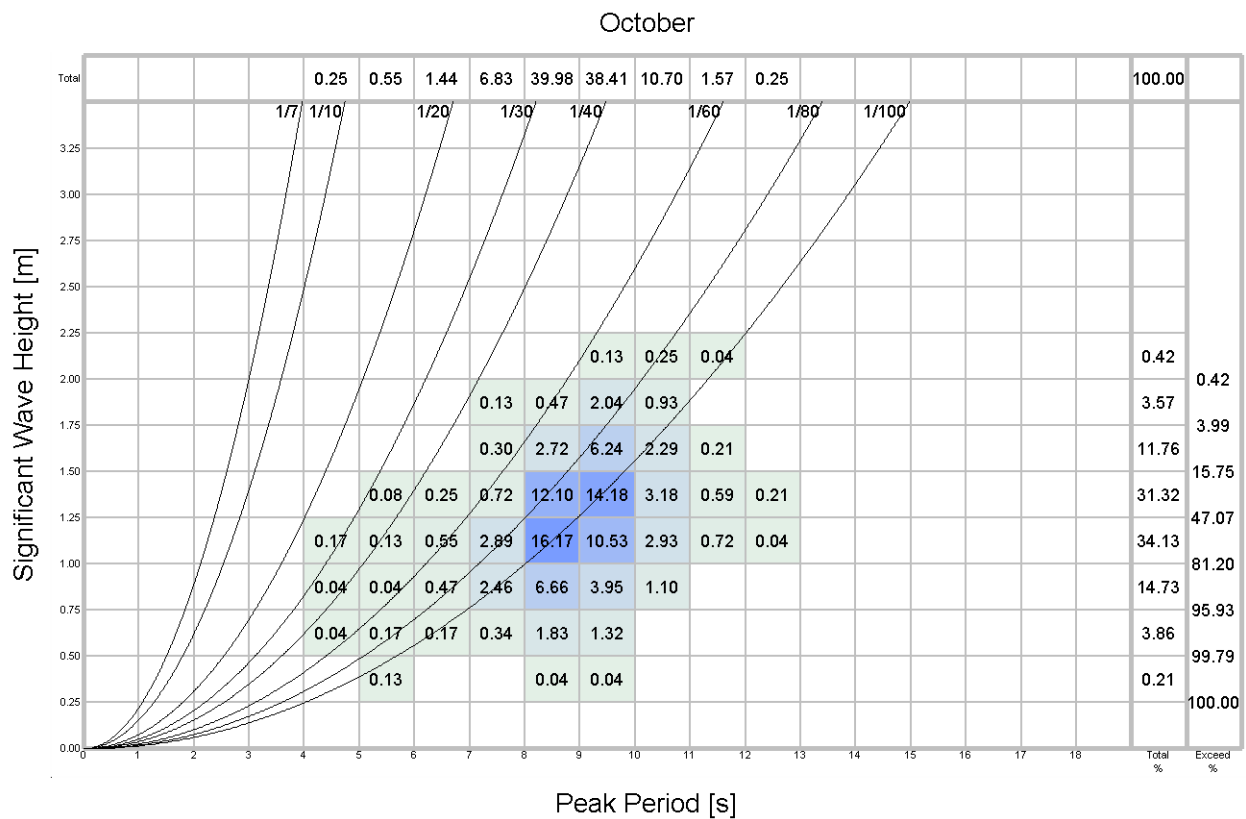

Figure 3.3.11: Percentage Occurrence of Hs and Tp – October

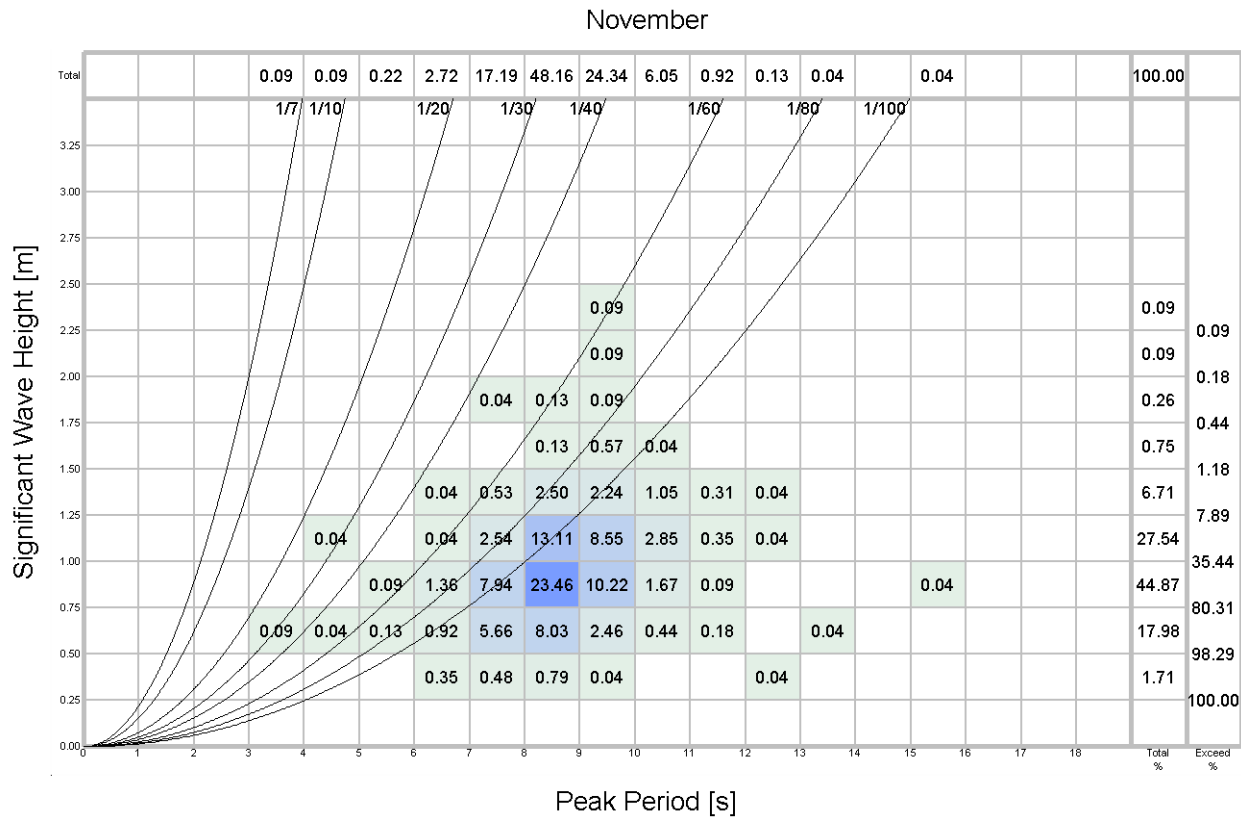

Figure 3.3.12: Percentage Occurrence of Hs and Tp – November

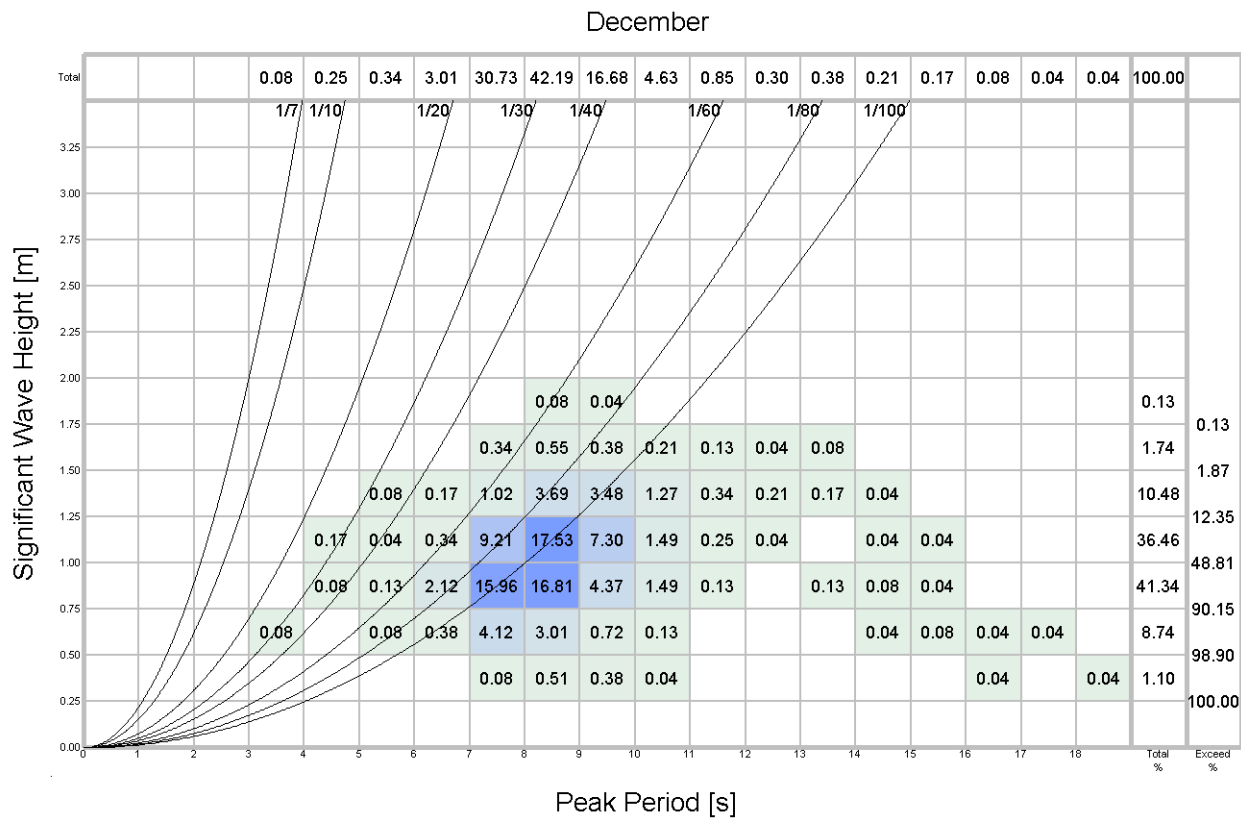

Figure 3.3.13: Percentage Occurrence of Hs and Tp – December
